# Supplementary material for: Evaluating the role of electron-correlation in the external prediction of the toxicity of nitrobenzenes towards Tetrahymena pyriformis
Source: Royal Society of Chemistry journal article supplement (doi:10.1039/c5nj02552d), 2016-01-01

# Evaluating the role of electron-correlation in the external prediction of the toxicity of Nitrobenzenes towards *Tetrahymena pyriformis*

Reenu and Vikas\*

Quantum Chemistry Group, Department of Chemistry & Centre of Advanced Studies in Chemistry, Panjab University, Chandigarh-160014, India

## Supporting Information Tables S1-S7

### List of Tables

|                 |                                                                                                                                                                                                                                                                                                                                                                                                                                                                                                                                                                                                                                            |
|-----------------|--------------------------------------------------------------------------------------------------------------------------------------------------------------------------------------------------------------------------------------------------------------------------------------------------------------------------------------------------------------------------------------------------------------------------------------------------------------------------------------------------------------------------------------------------------------------------------------------------------------------------------------------|
| <b>Table S1</b> | Computed values of quantum-chemical descriptors: Total energy ( $E$ ), energies of HOMO and LUMO ( $E_{\text{HOMO}}$ and $E_{\text{LUMO}}$ ), dipole moment ( $d$ ), absolute electronegativity ( $\chi$ ), chemical hardness ( $\eta$ ), electrophilicity index ( $\omega$ ), and their correlation contribution (CORR), (all in a.u., 1a.u.=27.21165 eV, 627.50956 kcal/mol except dipole moment, which is in debye) calculated HF/6-311G (d,p), DFT/B3LYP/6-311G(d,p) and PM7 level of the theory for 43 alkyl- and halogen-substituted nitrobenzenes along with their inhibitory growth concentration as $\text{Log } IGC_{50}^{-1}$ . |
| <b>Table S2</b> | Compounds in the training set (T), prediction set (P) and excluded set (E) in different types of splitting methods employed <sup>a</sup> . Excluded compounds are either response or structural outliers (determined from Williams plot).                                                                                                                                                                                                                                                                                                                                                                                                  |
| <b>Table S3</b> | Value of internal and external validation parameters of two- and one-descriptor QSAR models, for inhibitory growth concentration ( $\text{Log } IGC_{50}^{-1}$ ) of alkyl- and halogen-substituted nitrobenzenes, developed using PM7, HF, DFT and electron-correlation contribution (CORR) based descriptors through activity sampling (ordered response) splitting method.                                                                                                                                                                                                                                                               |
| <b>Table S4</b> | Value of internal and external validation parameters of two- and one-descriptor QSAR models, for inhibitory growth concentration ( $\text{Log } IGC_{50}^{-1}$ ) of alkyl- and halogen-substituted nitrobenzenes, developed using PM7, HF, DFT and electron-correlation contribution (CORR) based descriptors through 30% ordered response splitting method.                                                                                                                                                                                                                                                                               |
| <b>Table S5</b> | Value of internal and external validation parameters of two- and one-descriptor QSAR models, for inhibitory growth concentration ( $\text{Log } IGC_{50}^{-1}$ ) of alkyl- and halogen-substituted nitrobenzenes, developed using PM7, HF, DFT and electron-correlation contribution (CORR) based descriptors through 45% ordered response splitting method.                                                                                                                                                                                                                                                                               |
| <b>Table S6</b> | Value of internal validation parameters of two- and one-descriptor QSAR models, for inhibitory growth concentration ( $\text{Log } IGC_{50}^{-1}$ ) of alkyl- and halogen-substituted nitrobenzenes, developed using PM7, HF, DFT and electron-correlation contribution (CORR) based descriptors, by employing complete data set comprising of 42 compounds in the training set, with no prediction set.                                                                                                                                                                                                                                   |
| <b>Table S7</b> | Value of internal validation parameters of two- and one-descriptor QSAR models, for inhibitory growth concentration ( $\text{Log } IGC_{50}^{-1}$ ) of alkyl- and halogen-substituted nitrobenzenes, developed using PM7, HF, DFT and electron-correlation contribution (CORR) based descriptors, by employing full data set comprising of 35 compounds in the training set excluding outliers as listed in Table S1, with no prediction set.                                                                                                                                                                                              |

**Table 1.** Computed values of quantum-chemical descriptors: Total energy ( $E$ ), energies of HOMO and LUMO ( $E_{\text{HOMO}}$  and  $E_{\text{LUMO}}$ ), dipole moment ( $d$ ), absolute electronegativity ( $\chi$ ), chemical hardness ( $\eta$ ), electrophilicity index ( $\omega$ ), and their correlation contribution (CORR), (all in a.u., 1a.u.=27.21165 eV, 627.50956 kcal/mol except dipole moment, which is in debye) calculated HF/6-311G (d,p), DFT/B3LYP/6-311G(d,p) and PM7 level of the theory for 43 alkyl- and halogen-substituted nitrobenzenes along with their inhibitory growth concentration as Log  $IGC_{50}^{-1}$ .

| Sr. No. | Name of Compounds                   | Log $IGC_{50}^{-1}$ | $-E_{\text{PM7}}$ | $-E_{\text{HF}}$ | $-E_{\text{DFT}}$ | $-E_{\text{CORR}}$ | $-E_{\text{PM7}}^{\text{HOMO}}$ | $-E_{\text{HF}}^{\text{HOMO}}$ | $-E_{\text{DFT}}^{\text{HOMO}}$ | $E_{\text{CORR}}^{\text{HOMO}}$ | $-E_{\text{PM7}}^{\text{LUMO}}$ | $E_{\text{HF}}^{\text{LUMO}}$ | $-E_{\text{DFT}}^{\text{LUMO}}$ | $-E_{\text{CORR}}^{\text{LUMO}}$ | $d_{\text{PM7}}$ | $d_{\text{HF}}$ | $d_{\text{DFT}}$ | $-d_{\text{CORR}}$ |
|---------|-------------------------------------|---------------------|-------------------|------------------|-------------------|--------------------|---------------------------------|--------------------------------|---------------------------------|---------------------------------|---------------------------------|-------------------------------|---------------------------------|----------------------------------|------------------|-----------------|------------------|--------------------|
| 1       | 2-methylnitrobenzene                | 0.052               | 63.508            | 473.319          | 476.189           | 2.870              | 0.377                           | 0.357                          | 0.275                           | 0.082                           | 0.043                           | 0.064                         | 0.091                           | 0.155                            | 4.776            | 4.696           | 4.263            | 0.433              |
| 2       | 3methylnitrobenzene                 | 0.054               | 63.509            | 473.323          | 476.193           | 2.870              | 0.378                           | 0.356                          | 0.274                           | 0.082                           | 0.045                           | 0.057                         | 0.093                           | 0.150                            | 5.505            | 5.311           | 4.866            | 0.445              |
| 3       | nitrobenzene                        | 0.140               | 57.991            | 434.277          | 436.865           | 2.588              | 0.394                           | 0.369                          | 0.287                           | 0.082                           | 0.048                           | 0.055                         | 0.096                           | 0.151                            | 5.059            | 5.017           | 4.541            | 0.476              |
| 4       | 4methylnitrobenzene                 | 0.170               | 63.506            | 473.324          | 476.194           | 2.869              | 0.378                           | 0.363                          | 0.278                           | 0.085                           | 0.026                           | 0.060                         | 0.092                           | 0.152                            | 5.979            | 5.618           | 5.201            | 0.417              |
| 5       | 2,6dimethylnitrobenzene             | 0.300               | 69.024            | 512.362          | 515.514           | 3.152              | 0.367                           | 0.347                          | 0.265                           | 0.082                           | 0.034                           | 0.082                         | 0.084                           | 0.166                            | 4.106            | 4.134           | 3.650            | 0.484              |
| 6       | 4bromonitrobenzene                  | 0.380               | 65.667            | 3006.058         | 3010.405          | 4.347              | 0.379                           | 0.370                          | 0.279                           | 0.091                           | 0.061                           | 0.043                         | 0.105                           | 0.148                            | 3.353            | 3.203           | 3.061            | 0.142              |
| 7       | 4chloronitrobenzene                 | 0.430               | 67.307            | 893.197          | 896.485           | 3.288              | 0.390                           | 0.376                          | 0.285                           | 0.091                           | 0.061                           | 0.044                         | 0.105                           | 0.149                            | 3.146            | 3.082           | 2.863            | 0.219              |
| 8       | 3,5dinitrobenzyl alcohol            | 0.530               | 107.806           | 790.758          | 795.301           | 4.543              | 0.401                           | 0.384                          | 0.293                           | 0.091                           | 0.071                           | 0.029                         | 0.115                           | 0.144                            | 6.736            | 6.815           | 6.238            | 0.577              |
| 9       | 2,3dimethylnitrobenzene             | 0.560               | 69.024            | 512.361          | 515.514           | 3.153              | 0.367                           | 0.347                          | 0.265                           | 0.082                           | 0.039                           | 0.072                         | 0.086                           | 0.158                            | 5.208            | 4.938           | 4.541            | 0.397              |
| 10      | 2methyl3chloronitrobenzene          | 0.680               | 72.823            | 932.234          | 935.806           | 3.572              | 0.377                           | 0.361                          | 0.274                           | 0.087                           | 0.052                           | 0.058                         | 0.098                           | 0.156                            | 3.422            | 3.456           | 3.101            | 0.354              |
| 11      | 2chloronitrobenzene                 | 0.680               | 67.303            | 893.182          | 896.472           | 3.290              | 0.383                           | 0.367                          | 0.279                           | 0.088                           | 0.052                           | 0.059                         | 0.097                           | 0.156                            | 5.466            | 5.552           | 4.952            | 0.600              |
| 12      | 3chloronitrobenzene                 | 0.730               | 67.306            | 893.195          | 896.484           | 3.288              | 0.386                           | 0.369                          | 0.282                           | 0.087                           | 0.060                           | 0.043                         | 0.106                           | 0.149                            | 4.244            | 4.264           | 3.835            | 0.429              |
| 13      | 2bromonitrobenzene                  | 0.750               | 65.662            | 3006.043         | 3010.393          | 4.350              | 0.371                           | 0.362                          | 0.273                           | 0.089                           | 0.052                           | 0.059                         | 0.096                           | 0.155                            | 5.362            | 5.394           | 4.774            | 0.620              |
| 14      | 2methyl5chloronitrobenzene          | 0.820               | 72.823            | 932.237          | 935.808           | 3.571              | 0.373                           | 0.357                          | 0.272                           | 0.085                           | 0.054                           | 0.052                         | 0.101                           | 0.153                            | 4.345            | 4.297           | 3.888            | 0.409              |
| 15      | 2,4,6trimethylnitrobenzene          | 0.860               | 74.544            | 551.409          | 554.842           | 3.433              | 0.365                           | 0.345                          | 0.260                           | 0.085                           | 0.030                           | 0.084                         | 0.081                           | 0.165                            | 5.016            | 4.677           | 4.262            | 0.415              |
| 16      | 6methyl1,3dinitrobenzene            | 0.870               | 91.449            | 676.837          | 680.741           | 3.904              | 0.407                           | 0.393                          | 0.304                           | 0.089                           | 0.071                           | 0.031                         | 0.115                           | 0.146                            | 5.490            | 5.385           | 4.854            | 0.531              |
| 17      | 1,3dinitrobenzene                   | 0.890               | 85.922            | 637.793          | 641.415           | 3.622              | 0.418                           | 0.404                          | 0.316                           | 0.088                           | 0.062                           | 0.023                         | 0.121                           | 0.144                            | 4.590            | 4.742           | 4.211            | 0.531              |
| 18      | 2,4dichloronitrobenzene             | 0.990               | 76.618            | 1352.100         | 1356.091          | 3.991              | 0.390                           | 0.378                          | 0.286                           | 0.092                           | 0.065                           | 0.047                         | 0.105                           | 0.152                            | 3.642            | 3.679           | 3.315            | 0.363              |
| 19      | 3bromonitrobenzene                  | 1.030               | 65.666            | 3006.057         | 3010.404          | 4.347              | 0.375                           | 0.364                          | 0.275                           | 0.089                           | 0.059                           | 0.043                         | 0.106                           | 0.149                            | 4.309            | 4.287           | 3.862            | 0.425              |
| 20      | 2,3dichloronitrobenzene             | 1.070               | 76.615            | 1352.094         | 1356.086          | 3.992              | 0.382                           | 0.371                          | 0.281                           | 0.090                           | 0.060                           | 0.052                         | 0.102                           | 0.154                            | 4.800            | 4.914           | 4.304            | 0.610              |
| 21      | 3,4dinitrobenzyl alcohol            | 1.090               | 107.795           | 790.739          | 795.285           | 4.546              | 0.398                           | 0.385                          | 0.286                           | 0.099                           | 0.066                           | 0.040                         | 0.109                           | 0.149                            | 9.500            | 9.542           | 8.684            | 0.858              |
| 22      | 2,5dichloronitrobenzene             | 1.130               | 76.617            | 1352.099         | 1356.090          | 3.991              | 0.380                           | 0.367                          | 0.278                           | 0.089                           | 0.064                           | 0.047                         | 0.106                           | 0.153                            | 4.317            | 4.420           | 3.915            | 0.505              |
| 23      | 3,5dichloronitrobenzene             | 1.130               | 76.619            | 1352.112         | 1356.101          | 3.989              | 0.390                           | 0.375                          | 0.287                           | 0.088                           | 0.071                           | 0.032                         | 0.115                           | 0.147                            | 3.022            | 2.951           | 2.643            | 0.309              |
| 24      | 3,4dichloronitrobenzene             | 1.160               | 76.618            | 1352.109         | 1356.099          | 3.990              | 0.387                           | 0.377                          | 0.286                           | 0.091                           | 0.070                           | 0.034                         | 0.112                           | 0.146                            | 2.849            | 2.833           | 2.645            | 0.188              |
| 25      | 3methyl4bromonitrobenzene           | 1.160               | 71.185            | 3045.104         | 3049.734          | 4.630              | 0.373                           | 0.363                          | 0.274                           | 0.089                           | 0.057                           | 0.045                         | 0.101                           | 0.146                            | 3.818            | 3.537           | 3.450            | 0.088              |
| 26      | 1,2dinitrobenzene                   | 1.250               | 85.919            | 637.774          | 641.399           | 3.625              | 0.416                           | 0.402                          | 0.299                           | 0.103                           | 0.074                           | 0.032                         | 0.117                           | 0.149                            | 7.284            | 7.577           | 6.667            | 0.910              |
| 27      | 1,4dinitrobenzene                   | 1.300               | 85.930            | 637.792          | 641.415           | 3.623              | 0.422                           | 0.399                          | 0.314                           | 0.085                           | 0.089                           | 0.007                         | 0.134                           | 0.141                            | 0.002            | 0.001           | 0.000            | 0.001              |
| 28      | 2,5dibromonitrobenzene              | 1.370               | 73.337            | 5577.822         | 5583.932          | 6.109              | 0.368                           | 0.359                          | 0.270                           | 0.089                           | 0.062                           | 0.048                         | 0.105                           | 0.153                            | 4.387            | 4.370           | 3.873            | 0.497              |
| 29      | 2,4,6trichloronitrobenzene          | 1.430               | 85.929            | 1811.009         | 1815.701          | 4.692              | 0.395                           | 0.384                          | 0.286                           | 0.098                           | 0.064                           | 0.066                         | 0.096                           | 0.162                            | 3.788            | 4.039           | 3.334            | 0.705              |
| 30      | 2,3,4trichloronitrobenzene          | 1.510               | 85.926            | 1811.006         | 1815.700          | 4.694              | 0.388                           | 0.380                          | 0.287                           | 0.093                           | 0.063                           | 0.043                         | 0.108                           | 0.151                            | 3.406            | 3.466           | 3.075            | 0.391              |
| 31      | 5methyl1,2dinitrobenzene            | 1.520               | 91.438            | 676.822          | 680.728           | 3.906              | 0.402                           | 0.389                          | 0.291                           | 0.098                           | 0.069                           | 0.038                         | 0.112                           | 0.150                            | 8.129            | 8.177           | 7.323            | 0.855              |
| 32      | 2,4,5trichloronitrobenzene          | 1.530               | 85.928            | 1811.012         | 1815.704          | 4.692              | 0.384                           | 0.375                          | 0.283                           | 0.092                           | 0.073                           | 0.038                         | 0.112                           | 0.150                            | 2.974            | 2.968           | 2.730            | 0.238              |
| 33      | 2,3,4,5tetrachloronitrobenzene      | 1.780               | 95.237            | 2269.916         | 2275.312          | 5.396              | 0.385                           | 0.379                          | 0.286                           | 0.093                           | 0.078                           | 0.035                         | 0.115                           | 0.150                            | 2.412            | 2.417           | 2.230            | 0.187              |
| 34      | 2,3,5,6tetrachloronitrobenzene      | 1.820               | 95.238            | 2269.915         | 2275.310          | 5.395              | 0.380                           | 0.375                          | 0.282                           | 0.093                           | 0.070                           | 0.058                         | 0.100                           | 0.158                            | 3.662            | 3.968           | 3.253            | 0.715              |
| 35      | 6chloro1,3dinitrobenzene            | 1.980               | 95.240            | 1096.697         | 1101.022          | 4.325              | 0.408                           | 0.401                          | 0.306                           | 0.095                           | 0.085                           | 0.017                         | 0.125                           | 0.142                            | 4.066            | 4.249           | 3.763            | 0.485              |
| 36      | 6iodo1,3dinitrobenzene              | 2.120               | 93.632            | 648.339          | 652.175           | 3.835              | 0.356                           | 0.375                          | 0.283                           | 0.092                           | 0.080                           | 0.018                         | 0.123                           | 0.141                            | 4.108            | 4.620           | 4.191            | 0.429              |
| 37      | 2,4,6trichloro1,3dinitrobenzene     | 2.190               | 113.861           | 2014.498         | 2020.230          | 5.732              | 0.410                           | 0.406                          | 0.299                           | 0.107                           | 0.085                           | 0.043                         | 0.111                           | 0.154                            | 3.609            | 3.920           | 3.207            | 0.714              |
| 38      | 1,2dichloro4,5dinitrobenzene        | 2.210               | 104.542           | 1555.602         | 1560.630          | 5.028              | 0.404                           | 0.400                          | 0.300                           | 0.100                           | 0.092                           | 0.014                         | 0.130                           | 0.144                            | 4.688            | 4.896           | 4.395            | 0.501              |
| 39      | 6bromo1,3dinitrobenzene             | 2.310               | 93.600            | 3209.558         | 3214.942          | 5.385              | 0.393                           | 0.393                          | 0.298                           | 0.095                           | 0.084                           | 0.017                         | 0.124                           | 0.141                            | 4.199            | 4.323           | 3.876            | 0.447              |
| 40      | 4,6dichloro1,2dinitrobenzene        | 2.420               | 104.543           | 1555.597         | 1560.626          | 5.029              | 0.406                           | 0.400                          | 0.297                           | 0.103                           | 0.090                           | 0.015                         | 0.130                           | 0.145                            | 5.500            | 5.869           | 4.963            | 0.906              |
| 41      | 2,4,5trichloro1,3dinitrobenzene     | 2.590               | 113.859           | 2014.501         | 2020.233          | 5.732              | 0.397                           | 0.395                          | 0.298                           | 0.097                           | 0.092                           | 0.018                         | 0.126                           | 0.144                            | 2.893            | 3.098           | 2.606            | 0.492              |
| 42      | 2,3,5,6tetrachloro1,4dinitrobenzene | 2.740               | 123.168           | 2473.403         | 2479.838          | 6.435              | 0.393                           | 0.394                          | 0.297                           | 0.097                           | 0.093                           | 0.036                         | 0.112                           | 0.148                            | 0.004            | 0.001           | 0.001            | 0.001              |
| 43      | pentachloronitrobenzene             | NTAS*               | 104.547           | 2728.819         | 2734.918          | 6.099              | 0.384                           | 0.380                          | 0.287                           | 0.093                           | 0.077                           | 0.051                         | 0.103                           | 0.154                            | 2.642            | 2.911           | 2.414            | 0.497              |

\*Not toxic at saturation [Ref. 17]

Table 1 continued....

| Sr. No. | Name of Compounds                   | Log $IGC_{50}^{-1}$ | $\chi_{PM7}$ | $\chi_{HF}$ | $\chi_{DFT}$ | $\chi_{CORR}$ | $\eta_{PM7}$ | $\eta_{HF}$ | $\eta_{DFT}$ | $-\eta_{CORR}$ | $\omega_{M7}$ | $\omega_{HF}$ | $\omega_{DFT}$ | $-\omega_{CORR}$ |
|---------|-------------------------------------|---------------------|--------------|-------------|--------------|---------------|--------------|-------------|--------------|----------------|---------------|---------------|----------------|------------------|
| 1       | 2-methylnitrobenzene                | 0.052               | 0.210        | 0.147       | 0.183        | 0.037         | 0.334        | 0.421       | 0.184        | 0.237          | 0.066         | 0.025         | 0.091          | 0.003            |
| 2       | 3methylnitrobenzene                 | 0.054               | 0.212        | 0.150       | 0.184        | 0.034         | 0.333        | 0.413       | 0.181        | 0.232          | 0.067         | 0.027         | 0.093          | 0.002            |
| 3       | nitrobenzene                        | 0.140               | 0.221        | 0.157       | 0.192        | 0.035         | 0.346        | 0.424       | 0.191        | 0.233          | 0.071         | 0.029         | 0.096          | 0.003            |
| 4       | 4methylnitrobenzene                 | 0.170               | 0.202        | 0.152       | 0.185        | 0.034         | 0.351        | 0.423       | 0.186        | 0.237          | 0.058         | 0.027         | 0.092          | 0.002            |
| 5       | 2,6dimethylnitrobenzene             | 0.300               | 0.201        | 0.133       | 0.175        | 0.042         | 0.333        | 0.429       | 0.181        | 0.248          | 0.060         | 0.020         | 0.084          | 0.004            |
| 6       | 4bromonitrobenzene                  | 0.380               | 0.220        | 0.164       | 0.192        | 0.029         | 0.318        | 0.413       | 0.174        | 0.239          | 0.076         | 0.032         | 0.106          | 0.002            |
| 7       | 4chloronitrobenzene                 | 0.430               | 0.225        | 0.166       | 0.195        | 0.029         | 0.329        | 0.420       | 0.180        | 0.240          | 0.077         | 0.033         | 0.106          | 0.002            |
| 8       | 3,5dinitrobenzyl alcohol            | 0.530               | 0.236        | 0.178       | 0.204        | 0.027         | 0.330        | 0.413       | 0.178        | 0.235          | 0.084         | 0.038         | 0.117          | 0.001            |
| 9       | 2,3dimethylnitrobenzene             | 0.560               | 0.203        | 0.138       | 0.176        | 0.038         | 0.327        | 0.419       | 0.179        | 0.240          | 0.063         | 0.023         | 0.086          | 0.003            |
| 10      | 2methyl3chloronitrobenzene          | 0.680               | 0.215        | 0.152       | 0.186        | 0.035         | 0.325        | 0.419       | 0.176        | 0.243          | 0.071         | 0.027         | 0.098          | 0.002            |
| 11      | 2chloronitrobenzene                 | 0.680               | 0.218        | 0.154       | 0.188        | 0.034         | 0.331        | 0.426       | 0.182        | 0.244          | 0.072         | 0.028         | 0.097          | 0.002            |
| 12      | 3chloronitrobenzene                 | 0.730               | 0.223        | 0.163       | 0.194        | 0.031         | 0.326        | 0.412       | 0.176        | 0.236          | 0.076         | 0.032         | 0.107          | 0.002            |
| 13      | 2bromonitrobenzene                  | 0.750               | 0.212        | 0.152       | 0.185        | 0.033         | 0.319        | 0.421       | 0.177        | 0.244          | 0.070         | 0.027         | 0.096          | 0.002            |
| 14      | 2methyl5chloronitrobenzene          | 0.820               | 0.214        | 0.153       | 0.187        | 0.034         | 0.320        | 0.409       | 0.171        | 0.238          | 0.071         | 0.028         | 0.102          | 0.002            |
| 15      | 2,4,6trimethylnitrobenzene          | 0.860               | 0.198        | 0.131       | 0.171        | 0.040         | 0.335        | 0.429       | 0.179        | 0.250          | 0.058         | 0.020         | 0.081          | 0.003            |
| 16      | 6methyl1,3dinitrobenzene            | 0.870               | 0.239        | 0.181       | 0.210        | 0.029         | 0.335        | 0.424       | 0.189        | 0.235          | 0.085         | 0.039         | 0.116          | 0.002            |
| 17      | 1,3dinitrobenzene                   | 0.890               | 0.240        | 0.191       | 0.219        | 0.028         | 0.356        | 0.427       | 0.195        | 0.232          | 0.081         | 0.042         | 0.122          | 0.002            |
| 18      | 2,4dichloronitrobenzene             | 0.990               | 0.227        | 0.166       | 0.196        | 0.030         | 0.325        | 0.425       | 0.181        | 0.244          | 0.079         | 0.032         | 0.106          | 0.002            |
| 19      | 3bromonitrobenzene                  | 1.030               | 0.217        | 0.161       | 0.191        | 0.030         | 0.316        | 0.407       | 0.169        | 0.238          | 0.075         | 0.032         | 0.107          | 0.002            |
| 20      | 2,3dichloronitrobenzene             | 1.070               | 0.221        | 0.160       | 0.192        | 0.032         | 0.321        | 0.423       | 0.179        | 0.244          | 0.076         | 0.030         | 0.102          | 0.002            |
| 21      | 3,4dinitrobenzyl alcohol            | 1.090               | 0.232        | 0.173       | 0.198        | 0.025         | 0.332        | 0.425       | 0.177        | 0.248          | 0.081         | 0.035         | 0.110          | 0.001            |
| 22      | 2,5dichloronitrobenzene             | 1.130               | 0.222        | 0.160       | 0.192        | 0.032         | 0.317        | 0.414       | 0.172        | 0.242          | 0.078         | 0.031         | 0.107          | 0.002            |
| 23      | 3,5dichloronitrobenzene             | 1.130               | 0.230        | 0.172       | 0.201        | 0.030         | 0.319        | 0.407       | 0.172        | 0.235          | 0.083         | 0.036         | 0.117          | 0.002            |
| 24      | 3,4dichloronitrobenzene             | 1.160               | 0.228        | 0.172       | 0.199        | 0.028         | 0.317        | 0.411       | 0.174        | 0.237          | 0.082         | 0.036         | 0.114          | 0.002            |
| 25      | 3methyl4bromonitrobenzene           | 1.160               | 0.215        | 0.159       | 0.188        | 0.029         | 0.316        | 0.408       | 0.173        | 0.235          | 0.073         | 0.031         | 0.102          | 0.002            |
| 26      | 1,2dinitrobenzene                   | 1.250               | 0.245        | 0.185       | 0.208        | 0.023         | 0.343        | 0.434       | 0.182        | 0.252          | 0.087         | 0.039         | 0.119          | 0.001            |
| 27      | 1,4dinitrobenzene                   | 1.300               | 0.256        | 0.196       | 0.224        | 0.028         | 0.333        | 0.406       | 0.180        | 0.226          | 0.098         | 0.047         | 0.139          | 0.002            |
| 28      | 2,5dibromonitrobenzene              | 1.370               | 0.215        | 0.156       | 0.188        | 0.032         | 0.306        | 0.407       | 0.165        | 0.242          | 0.075         | 0.030         | 0.107          | 0.002            |
| 29      | 2,4,6trichloronitrobenzene          | 1.430               | 0.230        | 0.159       | 0.191        | 0.032         | 0.330        | 0.450       | 0.190        | 0.260          | 0.080         | 0.028         | 0.096          | 0.002            |
| 30      | 2,3,4trichloronitrobenzene          | 1.510               | 0.226        | 0.169       | 0.198        | 0.029         | 0.325        | 0.423       | 0.179        | 0.244          | 0.078         | 0.034         | 0.109          | 0.002            |
| 31      | 5methyl1,2dinitrobenzene            | 1.520               | 0.235        | 0.176       | 0.202        | 0.026         | 0.333        | 0.427       | 0.179        | 0.248          | 0.083         | 0.036         | 0.113          | 0.001            |
| 32      | 2,4,5trichloronitrobenzene          | 1.530               | 0.228        | 0.169       | 0.198        | 0.029         | 0.310        | 0.413       | 0.171        | 0.242          | 0.084         | 0.034         | 0.114          | 0.002            |
| 33      | 2,3,4,5tetrachloronitrobenzene      | 1.780               | 0.232        | 0.172       | 0.201        | 0.029         | 0.307        | 0.414       | 0.171        | 0.243          | 0.088         | 0.036         | 0.118          | 0.002            |
| 34      | 2,3,5,6tetrachloronitrobenzene      | 1.820               | 0.225        | 0.159       | 0.191        | 0.033         | 0.310        | 0.433       | 0.182        | 0.251          | 0.082         | 0.029         | 0.100          | 0.002            |
| 35      | 6chloro1,3dinitrobenzene            | 1.980               | 0.247        | 0.192       | 0.216        | 0.024         | 0.323        | 0.418       | 0.181        | 0.237          | 0.094         | 0.044         | 0.128          | 0.001            |
| 36      | 6iodo1,3dinitrobenzene              | 2.120               | 0.218        | 0.179       | 0.203        | 0.025         | 0.276        | 0.393       | 0.160        | 0.233          | 0.086         | 0.041         | 0.129          | 0.001            |
| 37      | 2,4,6trichloro1,3dinitrobenzene     | 2.190               | 0.248        | 0.182       | 0.205        | 0.024         | 0.325        | 0.449       | 0.188        | 0.261          | 0.094         | 0.037         | 0.112          | 0.001            |
| 38      | 1,2dichloro4,5dinitrobenzene        | 2.210               | 0.248        | 0.193       | 0.215        | 0.022         | 0.312        | 0.414       | 0.170        | 0.244          | 0.098         | 0.045         | 0.136          | 0.001            |
| 39      | 6bromo1,3dinitrobenzene             | 2.310               | 0.239        | 0.188       | 0.211        | 0.023         | 0.309        | 0.410       | 0.174        | 0.236          | 0.092         | 0.043         | 0.128          | 0.001            |
| 40      | 4,6dichloro1,2dinitrobenzene        | 2.420               | 0.248        | 0.193       | 0.214        | 0.021         | 0.316        | 0.415       | 0.167        | 0.248          | 0.097         | 0.045         | 0.136          | 0.001            |
| 41      | 2,4,5trichloro1,3dinitrobenzene     | 2.590               | 0.244        | 0.189       | 0.212        | 0.024         | 0.306        | 0.413       | 0.172        | 0.241          | 0.098         | 0.043         | 0.131          | 0.001            |
| 42      | 2,3,5,6tetrachloro1,4dinitrobenzene | 2.740               | 0.243        | 0.179       | 0.205        | 0.026         | 0.300        | 0.430       | 0.185        | 0.245          | 0.099         | 0.037         | 0.113          | 0.001            |
| 43      | pentachloronitrobenzene             | NTAS*               | 0.231        | 0.165       | 0.195        | 0.031         | 0.307        | 0.431       | 0.184        | 0.247          | 0.087         | 0.031         | 0.103          | 0.002            |

\*Not toxic at saturation [Ref. 17]

**Table S2.** Compounds in the training set (T), prediction set (P) and excluded set (E) in different types of splitting methods employed<sup>a</sup>. Excluded compounds are either response or structural outliers (determined from Williams plot).

| <i>ID Number of Chemicals</i>                | <i>Name of the Chemicals</i>           | <i>Log IGC<sub>50</sub><sup>-1</sup></i> | <i>Complete Set</i> | <i>Full Set (excluding outliers)</i> | <i>Activity Sampling (ordered response splitting)</i> | <i>30% ordered response splitting</i> | <i>45% ordered response splitting</i> |
|----------------------------------------------|----------------------------------------|------------------------------------------|---------------------|--------------------------------------|-------------------------------------------------------|---------------------------------------|---------------------------------------|
| 1                                            | 2-methylnitrobenzene                   | 0.052                                    | T                   | T                                    | T                                                     | T                                     | T                                     |
| 2                                            | 3-methylnitrobenzene                   | 0.054                                    | T                   | T                                    | P                                                     | P                                     | P                                     |
| 3                                            | nitrobenzene                           | 0.140                                    | T                   | T                                    | T                                                     | P                                     | P                                     |
| 4                                            | 4-methylnitrobenzene                   | 0.170                                    | T                   | T                                    | P                                                     | T                                     | T                                     |
| 5                                            | 2,6-dimethylnitrobenzene               | 0.300                                    | T                   | E                                    | E                                                     | E                                     | E                                     |
| 6                                            | 4-bromonitrobenzene                    | 0.380                                    | T                   | T                                    | T                                                     | T                                     | T                                     |
| 7                                            | 4-chloronitrobenzene                   | 0.430                                    | T                   | T                                    | P                                                     | T                                     | P                                     |
| 8                                            | 3,5-dinitrobenzyl alcohol              | 0.530                                    | T                   | E                                    | E                                                     | E                                     | E                                     |
| 9                                            | 2,3-dimethylnitrobenzene               | 0.560                                    | T                   | T                                    | T                                                     | T                                     | T                                     |
| 10                                           | 2-methyl-3-chloronitrobenzene          | 0.680                                    | T                   | T                                    | P                                                     | P                                     | T                                     |
| 11                                           | 2-chloronitrobenzene                   | 0.680                                    | T                   | T                                    | T                                                     | T                                     | P                                     |
| 12                                           | 3-chloronitrobenzene                   | 0.730                                    | T                   | T                                    | P                                                     | T                                     | T                                     |
| 13                                           | 2-bromonitrobenzene                    | 0.750                                    | T                   | T                                    | T                                                     | T                                     | T                                     |
| 14                                           | 2-methyl-5-chloronitrobenzene          | 0.820                                    | T                   | T                                    | P                                                     | P                                     | P                                     |
| 15                                           | 2,4,6-trimethylnitrobenzene            | 0.860                                    | T                   | T                                    | T                                                     | T                                     | T                                     |
| 16                                           | 6-methyl-1,3-dinitrobenzene            | 0.870                                    | T                   | T                                    | P                                                     | T                                     | T                                     |
| 17                                           | 1,3-dinitrobenzene                     | 0.890                                    | T                   | T                                    | T                                                     | T                                     | P                                     |
| 18                                           | 2,4-dichloronitrobenzene               | 0.990                                    | T                   | T                                    | P                                                     | T                                     | P                                     |
| 19                                           | 3-bromonitrobenzene                    | 1.030                                    | T                   | T                                    | T                                                     | P                                     | T                                     |
| 20                                           | 2,3-dichloronitrobenzene               | 1.070                                    | T                   | T                                    | P                                                     | T                                     | T                                     |
| 21                                           | 3,4-dinitrobenzyl alcohol              | 1.090                                    | T                   | T                                    | T                                                     | T                                     | T                                     |
| 22                                           | 2,5-dichloronitrobenzene               | 1.130                                    | T                   | T                                    | P                                                     | T                                     | P                                     |
| 23                                           | 3,5-dichloronitrobenzene               | 1.130                                    | T                   | T                                    | T                                                     | P                                     | T                                     |
| 24                                           | 3,4-dichloronitrobenzene               | 1.160                                    | T                   | T                                    | P                                                     | T                                     | P                                     |
| 25                                           | 3-methyl-4-bromonitrobenzene           | 1.160                                    | T                   | T                                    | T                                                     | P                                     | P                                     |
| 26                                           | 1,2-dinitrobenzene                     | 1.250                                    | T                   | E                                    | E                                                     | E                                     | E                                     |
| 27                                           | 1,4-dinitrobenzene                     | 1.300                                    | T                   | T                                    | P                                                     | T                                     | T                                     |
| 28                                           | 2,5-dibromonitrobenzene                | 1.370                                    | T                   | E                                    | E                                                     | E                                     | E                                     |
| 29                                           | 2,4,6-trichloronitrobenzene            | 1.430                                    | T                   | T                                    | T                                                     | T                                     | T                                     |
| 30                                           | 2,3,4-trichloronitrobenzene            | 1.510                                    | T                   | T                                    | P                                                     | T                                     | P                                     |
| 31                                           | 5-methyl-1,2-dinitrobenzene            | 1.520                                    | T                   | T                                    | T                                                     | T                                     | T                                     |
| 32                                           | 2,4,5-trichloronitrobenzene            | 1.530                                    | T                   | T                                    | P                                                     | T                                     | T                                     |
| 33                                           | 2,3,4,5-tetrachloronitrobenzene        | 1.780                                    | T                   | T                                    | T                                                     | P                                     | P                                     |
| 34                                           | 2,3,5,6-tetrachloronitrobenzene        | 1.820                                    | T                   | T                                    | P                                                     | P                                     | P                                     |
| 35                                           | 6-chloro-1,3-dinitrobenzene            | 1.980                                    | T                   | T                                    | T                                                     | T                                     | T                                     |
| 36                                           | 6-iodo-1,3-dinitrobenzene              | 2.120                                    | T                   | E                                    | E                                                     | E                                     | E                                     |
| 37                                           | 2,4,6-trichloro-1,3-dinitrobenzene     | 2.190                                    | T                   | E                                    | E                                                     | E                                     | E                                     |
| 38                                           | 1,2-dichloro-4,5-dinitrobenzene        | 2.210                                    | T                   | T                                    | P                                                     | T                                     | P                                     |
| 39                                           | 6-bromo-1,3-dinitrobenzene             | 2.310                                    | T                   | T                                    | T                                                     | T                                     | T                                     |
| 40                                           | 4,6-dichloro-1,2-dinitrobenzene        | 2.420                                    | T                   | T                                    | P                                                     | P                                     | T                                     |
| 41                                           | 2,4,5-trichloro-1,3-dinitrobenzene     | 2.590                                    | T                   | T                                    | T                                                     | T                                     | T                                     |
| 42                                           | 2,3,5,6-tetrachloro-1,4-dinitrobenzene | 2.740                                    | T                   | E                                    | E                                                     | E                                     | E                                     |
| <b>Number of compounds in Training Set</b>   |                                        |                                          | 42                  | 35                                   | 18                                                    | 24                                    | 21                                    |
| <b>Number of compounds in Prediction Set</b> |                                        |                                          | 0                   | 0                                    | 17                                                    | 11                                    | 14                                    |
| <b>Number of compounds in Excluded Set</b>   |                                        |                                          | 0                   | 7                                    | 7                                                     | 7                                     | 7                                     |

<sup>a</sup> Splitting is performed through QSARINS software. Ref. [43] Chirico, N.; Papa, E.; Kovarich, S.; Cassani, S.; Gramatica, P. QSARINS, Software for QSAR MLR model development and validation. 2012. QSAR Res. Unit in Environ Chem and Ecotox University of Insubria, Varese, Italy, (<http://www.qsar.it>).

Table S3. Value of internal and external validation parameters of two- and one-descriptor QSAR models, for inhibitory growth concentration (Log  $IC_{50}$ ) of alkyl- and halogen-substituted nitrobenzenes, developed using PM7, HF, DFT and electron-correlation contribution (CORR) based descriptors through activity sampling (ordered responses) splitting method.

| Model | Variables           | N           |             |            |        |        |                     |                      |        |        |            | F          |           |                   |                   |                  |          |               |                   |                    |                    |                   |                      |                      |             |             |            |            |            |           |             |             |          |          |          |
|-------|---------------------|-------------|-------------|------------|--------|--------|---------------------|----------------------|--------|--------|------------|------------|-----------|-------------------|-------------------|------------------|----------|---------------|-------------------|--------------------|--------------------|-------------------|----------------------|----------------------|-------------|-------------|------------|------------|------------|-----------|-------------|-------------|----------|----------|----------|
|       |                     | $Q^2_{LOO}$ | $R^2_{adj}$ | $R^2_{cv}$ | $R^2$  | NR     | RMSSE <sub>cv</sub> | RMSSE <sub>ext</sub> | F      | ExtCOR | $Q^2_{15}$ | $Q^2_{10}$ | $Q^2_{5}$ | CCC <sub>15</sub> | CCC <sub>10</sub> | CCC <sub>5</sub> | $\chi^2$ | $\Delta_{cv}$ | MAE <sub>cv</sub> | MAE <sub>ext</sub> | MAE <sub>cv}</sub> | RSS <sub>cv</sub> | PRESS <sub>cv}</sub> | PRESS <sub>ext</sub> | $Q^2_{100}$ | $Q^2_{150}$ | $R^2_{cv}$ | $Q^2_{15}$ | $Q^2_{10}$ | $Q^2_{5}$ | $Q^2_{100}$ | $Q^2_{150}$ |          |          |          |
| 1     | $E_{CORR-E_{HF}}$   | 0.7138      | 0.0946      | 0.7828     | 0.0256 | 0.8084 | -0.0657             | 0.2996               | 0.3661 | 0.2061 | 31.6376    | 5          | 0.8932    | 0.8931            | 0.8930            | 0.8930           | 0.894    | 0.8421        | 0.939             | 0.7888             | 0.094              | 0.2271            | 0.2762               | 0.1642               | 1.6156      | 2.4237      | 0.7221     | 81.2052    | 59.8714    | 11.4945   | 28.2559     | 12.1912     | -27.6783 | 11.2708  | -27.1183 |
| 2     | $E_{PM7-E_{DFT}}$   | 0.7118      | 0.1103      | 0.7984     | 0.0237 | 0.8221 | 0.3008              | 0.2886               | 0.3674 | 0.1983 | 34.6675    | 5          | 0.9011    | 0.901             | 0.901             | 0.9024           | 0.8473   | 0.9427        | 0.748             | 0.9594             | 0.2336             | 0.2757            | 0.1523               | 1.4995               | 2.4295      | 0.6685      | 82.4457    | 59.5313    | 11.6118    | 29.3412   | 11.7442     | -28.2962    | 11.3306  | -28.678  |          |
| 3     | $E_{CORR-E_{PM7}}$  | 0.7071      | 0.1147      | 0.7912     | 0.0236 | 0.8138 | 0.302               | 0.2937               | 0.3742 | 0.1963 | 31.216     | 5          | 0.9229    | 0.9221            | 0.9219            | 0.9216           | 0.888    | 0.9439        | 0.8216            | 0.9594             | 0.2334             | 0.2756            | 0.1581               | 1.5529               | 2.4199      | 0.6562      | 82.1515    | 59.5313    | 11.534     | 28.303    | 12.1042     | -27.4903    | 11.6309  | -27.0911 |          |
| 4     | $E_{CORR-E_{DFT}}$  | 0.7079      | 0.1         | 0.7816     | 0.0257 | 0.8073 | 0.3025              | 0.2925               | 0.3703 | 0.1961 | 31.411     | 5          | 0.9033    | 0.9032            | 0.9031            | 0.9031           | 0.8883   | 0.9468        | 0.7981            | 0.967              | 0.2335             | 0.2755            | 0.1512               | 1.625                | 2.4178      | 0.6458      | 81.9442    | 59.5313    | 11.7746    | 27.6394   | 11.9466     | -27.8489    | 11.4665  | -27.8489 |          |
| 5     | $E_{CORR-E_{PM7}}$  | 0.6855      | 0.0988      | 0.7601     | 0.0282 | 0.7883 | 0.1493              | 0.3149               | 0.382  | 0.1894 | 27.8256    | 5          | 0.9008    | 0.9007            | 0.9006            | 0.9016           | 0.8264   | 0.9463        | 0.1919            | 0.9778             | 0.2321             | 0.2878            | 0.1566               | 1.7849               | 2.4242      | 0.6095      | 76.4706    | 55.9678    | 11.1393    | 27.4245   | 12.0688     | -28.0427    | 11.6466  | -27.917  |          |
| 6     | $E_{CORR-E_{DFT}}$  | 0.6815      | 0.0944      | 0.7461     | 0.0299 | 0.7786 | 0.126               | 0.3239               | 0.3862 | 0.1903 | 25.9795    | 5          | 0.9008    | 0.9008            | 0.9007            | 0.9027           | 0.7828   | 0.8262        | 0.1943            | 0.954              | 0.2308             | 0.2866            | 0.1544               | 1.5188               | 2.4888      | 0.6156      | 77.0878    | 55.9678    | 12.4681    | 27.4245   | 11.9798     | -28.048     | 11.6466  | -28.048  |          |
| 7     | $E_{CORR-E_{CORR}}$ | 0.6721      | 0.0902      | 0.7305     | 0.0317 | 0.7822 | 0.0625              | 0.3137               | 0.3919 | 0.2034 | 24.0428    | 4          | 0.8256    | 0.8254            | 0.8253            | 0.8253           | 0.8127   | 0.8758        | 0.5792            | 0.1779             | 0.2096             | 0.1039            | 0.2076               | 2.0046               | 2.7447      | 1.1791      | 76.5658    | 49.955     | 11.8772    | 27.6746   | 10.8023     | -29.292     | 11.4777  | -28.5731 |          |
| 8     | $E_{CORR-E_{PM7}}$  | 0.6716      | 0.1211      | 0.7651     | 0.0276 | 0.7927 | 0.0383              | 0.3116               | 0.3922 | 0.2043 | 26.8838    | 5          | 0.895     | 0.8949            | 0.8948            | 0.8944           | 0.8264   | 0.9408        | 0.7772            | 0.0951             | 0.2422             | 0.3001            | 0.1605               | 1.7474               | 2.7686      | 0.7099      | 79.991     | 51.3478    | 11.7515    | 28.5358   | 11.3404     | -28.9361    | 11.9632  | -28.3651 |          |
| 9     | $E_{CORR-E_{DFT}}$  | 0.6687      | 0.1012      | 0.7392     | 0.0307 | 0.7699 | 0.0323              | 0.3283               | 0.3939 | 0.2025 | 25.0979    | 5          | 0.8969    | 0.8968            | 0.8965            | 0.8917           | 0.8128   | 0.8939        | 0.8217            | 0.0302             | 0.2734             | 0.3316            | 0.1564               | 1.9397               | 2.7929      | 0.6969      | 77.5112    | 51.3478    | 11.5813    | 28.374    | 11.9884     | -27.6685    | 11.3326  | -27.757  |          |
| 10    | $E_{CORR-E_{CORR}}$ | 0.6686      | 0.104       | 0.7423     | 0.0303 | 0.7794 | 0.1686              | 0.3303               | 0.394  | 0.2044 | 24.8979    | 5          | 0.8949    | 0.8949            | 0.8948            | 0.8918           | 0.8135   | 0.9374        | 0.7963            | 0.0814             | 0.2667             | 0.3489            | 0.1636               | 1.9167               | 2.7939      | 0.7101      | 77.3249    | 53.2955    | 11.632     | 28.508    | 11.3184     | -28.8288    | 11.4892  | -28.6336 |          |
| 11    | $E_{CORR-E_{DFT}}$  | 0.658       | 0.1059      | 0.7324     | 0.0315 | 0.7639 | 0.1316              | 0.3325               | 0.4002 | 0.1925 | 24.2665    | 5          | 0.9058    | 0.9057            | 0.9059            | 0.8652           | 0.807    | 0.9424        | 0.7636            | 0.0785             | 0.2708             | 0.3294            | 0.1494               | 1.9904               | 2.8834      | 0.6301      | 76.5402    | 47.9975    | 10.5828    | 29.935    | 12.0449     | -27.7737    | 11.9528  | -28.0806 |          |
| 12    | $E_{CORR-E_{CORR}}$ | 0.6438      | 0.1006      | 0.7102     | 0.0341 | 0.7443 | 0.1109              | 0.3461               | 0.4085 | 0.1949 | 21.8337    | 5          | 0.9045    | 0.9044            | 0.9049            | 0.8534           | 0.7957   | 0.9389        | 0.7335            | 0.0829             | 0.2885             | 0.3453            | 0.1424               | 1.555                | 3.0032      | 0.6457      | 74.6332    | 44.392     | 11.5082    | 28.7427   | 11.8024     | -28.3623    | 11.8085  | -28.1559 |          |
| 13    | $E_{CORR}$          | 0.6335      | 0.0618      | 0.6741     | 0.032  | 0.6933 | 0.8236              | 0.379                | 0.4155 | 0.2635 | 36.165     | 5          | 0.8253    | 0.8252            | 0.8251            | 0.8189           | 0.7788   | 0.8921        | 0.7361            | 0.1228             | 0.3017             | 0.3355            | 0.1817               | 2.5858               | 3.1071      | 1.1806      | 68.9688    | 39.4566    | 10.2039    | 29.9887   | 5.8952      | -19.3182    | 5.7429   | -20.1775 |          |
| 14    | $E_{CORR-E_{CORR}}$ | 0.6245      | 0.1103      | 0.6995     | 0.0304 | 0.7448 | 0.0425              | 0.3524               | 0.4194 | 0.2137 | 20.7844    | 5          | 0.8852    | 0.8851            | 0.8851            | 0.8878           | 0.7888   | 0.8904        | 0.7781            | 0.0911             | 0.2791             | 0.3354            | 0.172                | 2.2355               | 3.1654      | 1.1701      | 74.4888    | 43.6869    | 11.6808    | 28.0063   | 11.7348     | -28.4265    | 11.9898  | -28.7624 |          |
| 15    | $E_{CORR-E_{DFT}}$  | 0.6216      | 0.0802      | 0.662      | 0.0388 | 0.7101 | 0.0382              | 0.3717               | 0.421  | 0.2764 | 17.6481    | 5          | 0.8078    | 0.8076            | 0.8076            | 0.8084           | 0.7753   | 0.8895        | 0.7991            | 0.1213             | 0.3038             | 0.3525            | 0.206                | 2.5143               | 3.1903      | 1.2992      | 69.8271    | 43.905     | 11.3215    | 11.4883   | 11.8426     | -28.2286    | 11.8299  | -31.7658 |          |
| 16    | $E_{CORR-E_{CORR}}$ | 0.6156      | 0.11        | 0.689      | 0.0366 | 0.7256 | 0.0396              | 0.3585               | 0.4243 | 0.2277 | 19.8844    | 5          | 0.8066    | 0.8065            | 0.8065            | 0.8041           | 0.7757   | 0.893         | 0.7946            | 0.0922             | 0.2881             | 0.3465            | 0.1674               | 2.1312               | 3.2409      | 1.2885      | 72.3623    | 48.2445    | 11.6208    | 28.7211   | 12.0219     | -27.6709    | 11.7713  | -28.5204 |          |
| 17    | $E_{CORR-E_{DFT}}$  | 0.6101      | 0.0984      | 0.6606     | 0.0389 | 0.7085 | 0.1457              | 0.3695               | 0.4271 | 0.2409 | 18.2275    | 5          | 0.8541    | 0.8539            | 0.8539            | 0.8294           | 0.7705   | 0.905         | 0.7072            | 0.1107             | 0.2947             | 0.3478            | 0.1705               | 2.4577               | 3.287       | 1.0865      | 71.005     | 42.9941    | 11.3212    | 29.889    | 12.1216     | -27.4009    | 11.9001  | -29.435  |          |
| 18    | $E_{PM7-E_{DFT}}$   | 0.6099      | 0.1855      | 0.7881     | 0.0273 | 0.7954 | 0.3153              | 0.3096               | 0.4274 | 0.2291 | 29.1537    | 4          | 0.775     | 0.7749            | 0.7749            | 0.775            | 0.6868   | 0.7971        | 0.8672            | 0.0921             | 0.1962             | 0.2543            | 0.129                | 0.2182               | 1.72        | 3.2896      | 1.521      | 86.417     | 46.942     | 11.428    | 34.6382     | 11.776      | -28.3647 | 12.0893  | -31.8865 |
| 19    | $E_{CORR-E_{DFT}}$  | 0.6093      | 0.1189      | 0.6919     | 0.0362 | 0.7382 | 0.1179              | 0.3568               | 0.4378 | 0.2378 | 20.8899    | 5          | 0.7916    | 0.7915            | 0.7915            | 0.8427           | 0.7748   | 0.8783        | 0.714             | 0.0346             | 0.2844             | 0.3414            | 0.2039               | 2.2018               | 3.2938      | 1.4083      | 71.13      | 42.5676    | 12.4508    | 26.677    | 12.109      | -27.6389    | 11.2884  | -28.375  |          |
| 20    | $E_{CORR-E_{CORR}}$ | 0.6091      | 0.0843      | 0.6525     | 0.0409 | 0.6934 | 0.2648              | 0.3709               | 0.4279 | 0.2629 | 36.9615    | 5          | 0.8262    | 0.826             | 0.826             | 0.818            | 0.7666   | 0.881         | 0.7623            | 0.1129             | 0.3032             | 0.3478            | 0.1811               | 2.5488               | 3.2959      | 1.1749      | 69.8239    | 47.4646    | 12.0943    | 28.4      | 11.865      | -28.0022    | 11.8689  | -29.4584 |          |
| 21    | $E_{PM7-E_{DFT}}$   | 0.6067      | 0.1536      | 0.7376     | 0.0366 | 0.6903 | 0.0521              | 0.3789               | 0.4275 | 0.2075 | 30.0513    | 5          | 0.8063    | 0.8063            | 0.8063            | 0.8095           | 0.7897   | 0.8936        | 0.6819            | 0.1239             | 0.2446             | 0.3196            | 0.203                | 1.8388               | 3.3161      | 1.3093      | 69.399     | 45.628     | 12.0442    | 29.84     | 11.825      | -28.5342    | 11.9744  | -28.9426 |          |
| 22    | $E_{PM7-E_{DFT}}$   | 0.5904      | 0.1935      | 0.75       | 0.0288 | 0.7888 | 0.105               | 0.3182               | 0.438  | 0.2879 | 27.1914    | 5          | 0.7916    | 0.7914            | 0.7914            | 0.8788           | 0.7884   | 0.834         | 0.6668            | 0.1045             | 0.2588             | 0.3327            | 0.206                | 1.8226               | 3.435       | 1.4087      | 78.8409    | 45.7273    | 11.7134    | 29.8111   | 11.4157     | -28.5187    | 11.6219  | -30.1669 |          |
| 23    | $E_{CORR-E_{DFT}}$  | 0.5895      | 0.1299      | 0.7019     | 0.0375 | 0.7194 | 0.8482              | 0.3245               | 0.4385 | 0.3756 | 41.0188    | 0          | 0.6451    | 0.6448            | 0.6448            | 0.8319           | 0.7884   | 0.8136        | 0.7309            | 0.1256             | 0.2918             | 0.3657            | 0.4609               | 0.2986               | 3.7281      | 4.0305      | 1.6502     | 70.1957    | 45.9157    | 10.957    | 24.627      | 10.3021     | -28.9349 | 11.9301  | -30.361  |
| 24    | $\omega_{PM7}$      | 0.5894      | 0.1189      | 0.6901     | 0.0382 | 0.7083 | 0.8416              | 0.3066               | 0.4385 | 0.3862 | 38.853     | 0          | 0.6459    | 0.6446            | 0.6446            | 0.8293           | 0.7652   | 0.7833        | 0.5508            | 0.2288             | 0.2994             | 0.3457            | 0.2869               | 2.4991               | 3.4612      | 1.5355      | 71.2039    | 39.3552    | 11.6732    | 19.2066   | 5.9687      | -19.3021    | 11.8399  | -15.574  |          |
| 25    | $E_{CORR-E_{DFT}}$  | 0.5852      | 0.1154      | 0.6571     | 0.0403 | 0.6975 | 0.1916              | 0.3764               | 0.4424 | 0.2813 | 17.2903    | 5          | 0.801     | 0.8008            | 0.8008            | 0.8292           | 0.7652   | 0.8814        | 0.711             | 0.1333             | 0.3088             | 0.3687            | 0.1999               | 2.5506               | 3.5236      | 1.3451      | 70.7167    | 40.1999    | 11.6368    | 19.9218   | 11.9717     | -28.0715    | 11.8991  | -34.8221 |          |
| 26    | $E_{PM7}$           | 0.5802      | 0.129       | 0.6698     | 0.0314 | 0.6892 | 0.3832              | 0.3815               | 0.4538 | 0.2713 | 35.763     | 4          | 0.8148    | 0.8147            | 0.8148            | 0.8148           | 0.7435   | 0.8773        | 0.583             | 0.192              | 0.2871             | 0.3324            | 0.2114               | 2.6204               | 3.7076      | 1.2517      | 69.9343    | 32.05      | 9.7052     | 19.3138   | 6.1885      | -19.1587    | 11.939   | -19.816  |          |
| 27    | $E_{CORR-E_{DFT}}$  | 0.5807      | 0.1571      | 0.6575     | 0.0403 | 0.6978 | 0.2559              | 0.3763               | 0.4638 | 0.2633 | 17.32      | 4          | 0.8256    | 0.8255            | 0.8255            | 0.822            | 0.7341   | 0.884         | 0.5962            | 0.1807             | 0.2815             | 0.3439            | 0.212                | 2.5475               | 3.8718      | 1.1786      | 70.7792    | 38.5881    | 11.6971    | 20.3436   | 11.8368     | -18.0865    | 12.3038  | -27.8287 |          |
| 28    | $E_{PM7-E_{DFT}}$   | 0.5823      | 0.1804      | 0.6688     | 0.0389 | 0.7046 | 0.1213              | 0.3694               | 0.4701 | 0.2824 | 18.2382    | 4          | 0.7994    | 0.799             |                   |                  |          |               |                   |                    |                    |                   |                      |                      |             |             |            |            |            |           |             |             |          |          |          |





Table S6. Value of internal validation parameters of two- and one-descriptor QSAR models, for inhibitory growth concentration ( $\text{Log } IGC_{50}$ ) of alkyl- and halogen-substituted nitrobenzenes, developed using PM7, HF, DFT and electron-correlation contribution (CORR) based descriptors, by employing complete data set comprising of 42 compounds in the training set, with no prediction set.

| Model | Variables                                                      | $Q^2_{\text{int}}$ | $R^2_{\text{int}}$ | $Q^2_{\text{ext}}$ | $R^2_{\text{ext}}$ | $R^2_{\text{ext}}$ | $R^2_{\text{ext}}$ | AK     | $RMS_{\text{vs}}$ | $RMS_{\text{cv}}$ | F      | CCC <sub>vs</sub> | CCC <sub>cv</sub> | MAE <sub>vs</sub> | MAE <sub>cv</sub> | BSS <sub>vs</sub> | PRESS <sub>vs</sub> | $R^2_{\text{int}}$ | $Q^2_{\text{int}}$ | $R^2_{\text{int}}$ | $Q^2_{\text{ext}}$ | $R^2_{\text{ext}}$ | $Q^2_{\text{ext}}$ | $R^2_{\text{ext}}$ | $Q^2_{\text{ext}}$ | $R^2_{\text{ext}}$ | $Q^2_{\text{ext}}$ |
|-------|----------------------------------------------------------------|--------------------|--------------------|--------------------|--------------------|--------------------|--------------------|--------|-------------------|-------------------|--------|-------------------|-------------------|-------------------|-------------------|-------------------|---------------------|--------------------|--------------------|--------------------|--------------------|--------------------|--------------------|--------------------|--------------------|--------------------|--------------------|
| 1     | $E_{\text{CORR}}^{\omega\text{PM7}}$                           | 0.7744             | 0.0317             | 0.7961             | 0.0099             | 0.8061             | 0.1082             | 0.3105 | 0.335             | 80.0581           | 0.8926 | 0.8758            | 0.2224            | 0.2416            | 4.0499            | 4.7126            | 80.8906             | 75.1785            | 4.9306             | -10.5181           | 4.797              | -10.5496           | 4.8924             | -10.6862           |                    |                    |                    |
| 2     | $E_{\text{CORR}}^{\text{LUMO}} E_{\text{PM7}}$                 | 0.7705             | 0.0361             | 0.7966             | 0.0099             | 0.8066             | 0.0903             | 0.3101 | 0.3378            | 81.3019           | 0.8929 | 0.874             | 0.2259            | 0.2466            | 4.0401            | 4.7931            | 80.8836             | 75.3285            | 4.8272             | -10.7709           | 4.6753             | -10.6588           | 4.6076             | -11.0062           |                    |                    |                    |
| 3     | $E_{\text{PM7}}^{\omega\text{PM7}}$                            | 0.7544             | 0.0438             | 0.7879             | 0.0103             | 0.7983             | 0.2527             | 0.3167 | 0.3494            | 77.1563           | 0.8878 | 0.8654            | 0.2273            | 0.2483            | 4.2134            | 5.1287            | 80.2466             | 73.9012            | 4.7441             | -10.8613           | 4.9644             | -10.3776           | 4.914              | -10.61             |                    |                    |                    |
| 4     | $E_{\text{CORR}}^{\omega\text{HF}}$                            | 0.7351             | 0.039              | 0.7626             | 0.0116             | 0.7742             | 0.2071             | 0.3351 | 0.3629            | 66.8409           | 0.8727 | 0.851             | 0.2525            | 0.2742            | 4.7168            | 5.5321            | 77.8056             | 71.5374            | 4.9761             | -10.3993           | 4.8008             | -10.4391           | 4.804              | -10.6845           |                    |                    |                    |
| 5     | $E_{\text{CORR}}^{\text{XHF}}$                                 | 0.723              | 0.0404             | 0.7513             | 0.0121             | 0.7634             | 0.1918             | 0.343  | 0.3711            | 62.9175           | 0.8658 | 0.8436            | 0.25              | 0.2715            | 4.9413            | 5.7855            | 76.6453             | 70.6075            | 5.0313             | -10.379            | 5.0244             | -10.2235           | 4.9907             | -10.4761           |                    |                    |                    |
| 6     | $E_{\text{CORR}}^{\text{EHF}}$                                 | 0.7158             | 0.0396             | 0.7429             | 0.0125             | 0.7534             | -0.089             | 0.3487 | 0.3759            | 60.2286           | 0.8687 | 0.839             | 0.2437            | 0.2645            | 5.1082            | 5.936             | 75.6682             | 71.0968            | 5.1155             | -10.7469           | 4.7688             | -10.5806           | 4.8817             | -11.165            |                    |                    |                    |
| 7     | $E_{\text{CORR}}^{\text{EHF}} E_{\text{PM7}}$                  | 0.7141             | 0.0371             | 0.7385             | 0.0128             | 0.7512             | 0.1815             | 0.3517 | 0.3771            | 58.8807           | 0.8579 | 0.8375            | 0.2546            | 0.2755            | 5.1958            | 5.9713            | 75.2042             | 70.0685            | 4.7836             | -10.7455           | 5.1374             | -10.2211           | 4.7337             | -10.8434           |                    |                    |                    |
| 8     | $E_{\text{CORR}}^{\text{EHOMO}} E_{\text{PM7}}$                | 0.7113             | 0.0517             | 0.7509             | 0.0122             | 0.763              | 0.0575             | 0.3433 | 0.3789            | 62.7936           | 0.8656 | 0.8378            | 0.2388            | 0.2612            | 4.9487            | 6.0289            | 76.8877             | 70.5231            | 5.008              | -10.6156           | 4.9188             | -10.3873           | 4.9539             | -10.7269           |                    |                    |                    |
| 9     | $E_{\text{CORR}}^{\text{XCORR}} E_{\text{PM7}}$                | 0.7108             | 0.0433             | 0.7414             | 0.0126             | 0.7541             | 0.1373             | 0.3497 | 0.3792            | 59.7865           | 0.8598 | 0.8359            | 0.2614            | 0.2842            | 5.1364            | 6.0403            | 75.0895             | 71.2462            | 4.8695             | -10.539            | 4.7521             | -10.5539           | 5.0095             | -10.4154           |                    |                    |                    |
| 10    | $E_{\text{PM7}}^{\text{LUMO}} E_{\text{PM7}}$                  | 0.7066             | 0.058              | 0.7526             | 0.0121             | 0.7646             | 0.0211             | 0.3421 | 0.3819            | 63.3481           | 0.8666 | 0.8357            | 0.2592            | 0.2841            | 4.9156            | 6.1269            | 76.7431             | 70.4088            | 4.5461             | -11.0478           | 4.7725             | -10.492            | 4.9606             | -10.5456           |                    |                    |                    |
| 11    | $E_{\text{CORR}}^{\text{XPM7}} E_{\text{PM7}}$                 | 0.7058             | 0.0375             | 0.7301             | 0.0132             | 0.7433             | 0.162              | 0.3573 | 0.3825            | 56.4536           | 0.8527 | 0.8319            | 0.2457            | 0.2656            | 5.3618            | 6.1446            | 74.3857             | 69.4339            | 4.9096             | -10.4982           | 4.9487             | -10.3973           | 4.8565             | -10.6452           |                    |                    |                    |
| 12    | $E_{\text{CORR}}^{\text{EHOMO}} E_{\text{PM7}}$                | 0.7053             | 0.0453             | 0.7378             | 0.0128             | 0.7506             | 0.2128             | 0.3522 | 0.3828            | 58.6771           | 0.8575 | 0.8322            | 0.2651            | 0.2881            | 5.2093            | 6.1557            | 75.2782             | 69.2635            | 5.1637             | -10.2968           | 5.0744             | -10.2183           | 4.907              | -10.481            |                    |                    |                    |
| 13    | $E_{\text{CORR}}^{\text{EHOMO}} E_{\text{CORR}}$               | 0.6963             | 0.0438             | 0.7205             | 0.0156             | 0.7341             | 0.0743             | 0.3636 | 0.3924            | 45.2307           | 0.8626 | 0.8226            | 0.2679            | 0.2915            | 5.5531            | 6.468             | 73.6821             | 67.9733            | 4.8604             | -10.7792           | 4.6964             | -10.569            | 4.5719             | -10.3026           |                    |                    |                    |
| 14    | $E_{\text{PM7}}^{\omega\text{PM7}}$                            | 0.6799             | 0.0616             | 0.7282             | 0.0133             | 0.7414             | 0.0042             | 0.3586 | 0.399             | 55.9101           | 0.8515 | 0.8181            | 0.2685            | 0.2937            | 5.4005            | 6.6859            | 74.8658             | 65.7077            | 5.0412             | -10.2692           | 4.7128             | -10.6817           | 4.8761             | -10.6236           |                    |                    |                    |
| 15    | $E_{\text{CORR}}^{\text{dCORR}} E_{\text{PM7}}$                | 0.6764             | 0.0535             | 0.716              | 0.0139             | 0.7298             | 0.1255             | 0.3665 | 0.4012            | 52.6801           | 0.8438 | 0.8152            | 0.2677            | 0.2923            | 5.6421            | 6.7588            | 73.2911             | 66.8612            | 4.7707             | -10.7046           | 5.1248             | -10.2023           | 4.5662             | -11.0536           |                    |                    |                    |
| 16    | $E_{\text{PM7}}^{\text{LUMO}} E_{\text{PM7}}$                  | 0.6683             | 0.0392             | 0.7006             | 0.0173             | 0.7076             | 0.0761             | 0.3813 | 0.4061            | 96.7787           | 0.8287 | 0.8074            | 0.3066            | 0.3246            | 6.1076            | 6.9266            | 70.7448             | 64.5062            | 2.4854             | -7.5902            | 2.4181             | -7.6383            | 2.4841             | -7.5532            |                    |                    |                    |
| 17    | $E_{\text{PM7}}^{\text{dPM7}} E_{\text{PM7}}$                  | 0.6592             | 0.0658             | 0.7109             | 0.0141             | 0.725              | 0.3729             | 0.3698 | 0.4117            | 55.4094           | 0.8406 | 0.8068            | 0.2854            | 0.3138            | 5.7432            | 7.1184            | 73.0336             | 65.7637            | 5.0698             | -10.7055           | 4.6236             | -10.745            | 4.9218             | -10.8443           |                    |                    |                    |
| 18    | $E_{\text{CORR}}^{\text{EHOMO}} E_{\text{CORR}}$               | 0.6463             | 0.0525             | 0.6834             | 0.0154             | 0.6988             | 0.2696             | 0.387  | 0.4194            | 45.2307           | 0.8626 | 0.8226            | 0.2679            | 0.2915            | 5.5531            | 7.386             | 70.3035             | 62.2533            | 4.7286             | -10.6406           | 4.6776             | -10.3701           | 4.6352             | -11.7049           |                    |                    |                    |
| 19    | $\omega\text{PM7}$                                             | 0.6418             | 0.0391             | 0.6729             | 0.008              | 0.6809             | 0.8252             | 0.3983 | 0.422             | 85.3619           | 0.8102 | 0.788             | 0.3234            | 0.3411            | 6.6638            | 7.4812            | 68.3094             | 59.9734            | 2.3941             | -7.6771            | 2.3373             | -7.7268            | 2.5416             | -7.539             |                    |                    |                    |
| 20    | $E_{\text{PM7}}^{\text{EHOMO}} E_{\text{PM7}}$                 | 0.627              | 0.0528             | 0.6634             | 0.0164             | 0.6798             | 0.038              | 0.399  | 0.4307            | 41.3948           | 0.8094 | 0.778             | 0.2876            | 0.3098            | 6.6878            | 7.7899            | 68.033              | 61.433             | 4.7706             | -10.6857           | 4.6815             | -10.6924           | 5.0332             | -10.4419           |                    |                    |                    |
| 21    | $E_{\text{PM7}}$                                               | 0.6174             | 0.0456             | 0.6546             | 0.0084             | 0.663              | 0.8143             | 0.4093 | 0.4362            | 78.7004           | 0.7974 | 0.7703            | 0.2936            | 0.3102            | 7.0378            | 7.9909            | 66.917              | 56.7013            | 2.5073             | -7.6001            | 2.3767             | -7.6801            | 2.4883             | -7.6083            |                    |                    |                    |
| 22    | $E_{\text{CORR}}$                                              | 0.6162             | 0.0374             | 0.645              | 0.0087             | 0.6536             | 0.8085             | 0.415  | 0.4368            | 75.4884           | 0.7906 | 0.7683            | 0.2945            | 0.3097            | 7.2335            | 8.015             | 65.603              | 57.761             | 2.442              | -7.7076            | 2.5775             | -7.4849            | 2.4304             | -7.7196            |                    |                    |                    |
| 23    | $E_{\text{CORR}}^{\text{EHOMO}} E_{\text{CORR}}$               | 0.616              | 0.0702             | 0.665              | 0.0161             | 0.6861             | 0.292              | 0.3951 | 0.437             | 42.4246           | 0.8138 | 0.7745            | 0.2765            | 0.3019            | 6.5554            | 8.0206            | 69.2483             | 60.9631            | 4.8771             | -10.6406           | 4.6776             | -10.4883           | 4.6523             | -11.6273           |                    |                    |                    |
| 24    | $E_{\text{PM7}}^{\text{XPM7}}$                                 | 0.6096             | 0.0599             | 0.6526             | 0.0169             | 0.6696             | -0.0053            | 0.4053 | 0.4406            | 39.5171           | 0.8021 | 0.7664            | 0.2969            | 0.3212            | 6.9005            | 8.1524            | 66.9847             | 59.8976            | 4.5279             | -10.8516           | 4.8915             | -10.4001           | 4.7991             | -10.674            |                    |                    |                    |
| 25    | $E_{\text{CORR}}^{\text{dPM7}}$                                | 0.6014             | 0.0571             | 0.6409             | 0.0175             | 0.6585             | 0.196              | 0.4121 | 0.4452            | 37.5929           | 0.7941 | 0.7612            | 0.2885            | 0.3128            | 7.1331            | 8.3248            | 66.1483             | 58.9004            | 4.8178             | -10.9374           | 4.8783             | -10.4468           | 4.9477             | -10.6969           |                    |                    |                    |
| 26    | $E_{\text{CORR}}^{\text{dCORR}}$                               | 0.6013             | 0.0591             | 0.6209             | 0.0174             | 0.6603             | 0.3951             | 0.411  | 0.4453            | 37.9072           | 0.7954 | 0.7598            | 0.2945            | 0.3201            | 7.0941            | 8.3275            | 66.4112             | 59.0569            | 4.8138             | -10.7669           | 4.8332             | -10.4968           | 5.0663             | -10.4755           |                    |                    |                    |
| 27    | $E_{\text{CORR}}^{\text{dCORR}}$                               | 0.5977             | 0.056              | 0.6359             | 0.0178             | 0.6537             | 0.1428             | 0.415  | 0.4473            | 36.8084           | 0.7906 | 0.7579            | 0.2946            | 0.3178            | 7.2325            | 8.4021            | 65.8141             | 58.2321            | 4.8409             | -10.4992           | 4.8285             | -10.4896           | 4.8498             | -10.6056           |                    |                    |                    |
| 28    | $E_{\text{CORR}}^{\text{dCORR}}$                               | 0.5952             | 0.0596             | 0.6372             | 0.0177             | 0.6569             | 0.2121             | 0.4143 | 0.4486            | 37.0013           | 0.7914 | 0.7569            | 0.2921            | 0.3177            | 7.2078            | 8.4533            | 65.982              | 57.6286            | 4.8396             | -10.8665           | 5.0017             | -10.3701           | 4.6352             | -11.1763           |                    |                    |                    |
| 29    | $E_{\text{CORR}}^{\text{dPM7}}$                                | 0.5885             | 0.096              | 0.6683             | 0.0162             | 0.6845             | 0.073              | 0.3961 | 0.4523            | 42.3093           | 0.8127 | 0.7568            | 0.2929            | 0.3265            | 6.5888            | 8.593             | 68.9562             | 60.422             | 5.0371             | -11.4574           | 4.8114             | -10.4759           | 4.7111             | -12.1894           |                    |                    |                    |
| 30    | $E_{\text{CORR}}^{\text{dHF}}$                                 | 0.5842             | 0.0719             | 0.6584             | 0.0176             | 0.6561             | 0.3561             | 0.4135 | 0.4547            | 37.2001           | 0.7923 | 0.7507            | 0.2931            | 0.3184            | 7.1825            | 8.6838            | 65.9035             | 57.5606            | 4.6812             | -10.9349           | 4.7001             | -10.6951           | 4.8484             | -10.76             |                    |                    |                    |
| 31    | $E_{\text{PM7}}^{\text{EHOMO}} E_{\text{CORR}}$                | 0.5164             | 0.0496             | 0.6051             | 0.0134             | 0.605              | 0.5762             | 0.4646 | 0.4904            | 52.1372           | 0.7228 | 0.6707            | 0.3699            | 0.39              | 9.0648            | 10.1005           | 56.7275             | 49.5059            | 2.5213             | -7.5938            | 2.6191             | -7.3801            | 2.4883             | -7.818             |                    |                    |                    |
| 32    | $E_{\text{HF}}^{\text{EHOMO}} E_{\text{DFT}}$                  | 0.492              | 0.0709             | 0.549              | 0.022              | 0.571              | 0.3378             | 0.4619 | 0.5026            | 25.9566           | 0.7269 | 0.6828            | 0.3667            | 0.3996            | 8.9591            | 10.6095           | 57.5935             | 48.4276            | 4.8597             | -11.0412           | 5.1868             | -10.0522           | 4.6143             | -11.4565           |                    |                    |                    |
| 33    | $\omega\text{DFT}$                                             | 0.4754             | 0.0939             | 0.5472             | 0.0221             | 0.5693             | 0.2929             | 0.4628 | 0.5107            | 25.7767           | 0.7256 | 0.6753            | 0.3649            | 0.4005            | 8.9947            | 10.9559           | 58.1132             | 46.6929            | 4.8363             | -11.1325           | 4.9594             | -10.402            | 4.7731             | -10.9417           |                    |                    |                    |
| 34    | $E_{\text{HF}}^{\omega\text{HF}}$                              | 0.4673             | 0.091              | 0.5357             | 0.0226             | 0.5583             | 0.2949             | 0.4686 | 0.5147            | 24.6508           | 0.7166 | 0.6676            | 0.389             | 0.4253            | 9.2241            | 11.1251           | 56.6839             | 46.1924            | 5.1298             | -10.6276           | 4.9585             | -10.3638           | 5.1635             | -10.7186           |                    |                    |                    |
| 35    | $E_{\text{HF}}^{\omega\text{HF}} E_{\text{DFT}}^{\text{LUMO}}$ | 0.4643             | 0.0911             | 0.5326             | 0.0228             | 0.5554             | 0.1859             | 0.4702 | 0.5161            | 24.3593           | 0.7142 | 0.6648            | 0.387             | 0.4231            | 9.2854            | 11.1884           | 56.942              | 43.9514            | 4.8651             | -10.8622           | 4.8916             | -10.4087           | 4.9937             | -10.6425           |                    |                    |                    |
| 36    | $X\text{CORR}$                                                 | 0.4613             | 0.0965             | 0.5351             | 0.0227             | 0.5578             | 0.2968             | 0.4689 | 0.5175            | 24.5967           | 0.7161 | 0.6646            | 0.3736            | 0.4102            | 9.2354            | 11.2499           | 56.1793             | 47.7036            | 4.9514             | -10.9542           | 5.0913             | -10.2008           | 4.9208             | -10.9293           |                    |                    |                    |
| 37    | $\omega\text{DFT}$                                             | 0.4599             | 0.0513             | 0.499              | 0.0122             | 0.5112             | 0.715              | 0.493  | 0.5182            | 41.8414           | 0.6766 | 0.6456            | 0.4               | 0.4212            | 10.2074           | 11.2797           | 51.1572             | 42.3698            | 2.3267</           |                    |                    |                    |                    |                    |                    |                    |                    |



Table S7. Value of internal validation parameters of two- and one-descriptor QSAR models, for inhibitory growth concentration ( $Log IC_{50}$ ) of alkyl- and halogen-substituted nitrobenzenes, developed using PM7, HF, DFT and electron-correlation contribution (CORR) based descriptors, by employing full data set comprising of 35 compounds in the training set excluding outliers as listed in Table S1, with no prediction set.

| Model | Variables                 | $Q^2_{100}$ | $R^2/Q^2_{100}$ | $R^2_{adj}$ | $R^2 - R^2_{adj}$ | $R^2$  | $\Delta K$ | $RMSE_{TR}$ | $RMSE_{CV}$ | $F$      | $CCC_{TR}$ | $CCC_{CV}$ | $MAE_{TR}$ | $MAE_{CV}$ | $RSS_{TR}$ | $PRESS_{CV}$ | $R^2_{100}$ | $Q^2_{100}$ | $R^2_{100}$ | $Q^2_{100}$ | $R^2_{100}$ | $Q^2_{100}$ | $R^2_{100}$ | $Q^2_{100}$ |
|-------|---------------------------|-------------|-----------------|-------------|-------------------|--------|------------|-------------|-------------|----------|------------|------------|------------|------------|------------|--------------|-------------|-------------|-------------|-------------|-------------|-------------|-------------|-------------|
| 1     | $E_{CORR}^{\omega PM7}$   | 0.8286      | 0.0297          | 0.8494      | 0.0089            | 0.8583 | 0.1108     | 0.248       | 0.2727      | 96.9148  | 0.9237     | 0.808      | 0.1832     | 0.202      | 2.152      | 2.6036       | 85.6795     | 81.6074     | 5.7223      | -13.1896    | 5.6215      | -13.135     | 5.9835      | -13.053     |
| 2     | $E_{PM7}^{\omega PM7}$    | 0.8179      | 0.0434          | 0.8526      | 0.0087            | 0.8613 | 0.2583     | 0.2453      | 0.2811      | 99.3484  | 0.9255     | 0.9036     | 0.1863     | 0.2081     | 2.1066     | 2.7654       | 86.4772     | 80.7938     | 5.9378      | -13.1119    | 5.7862      | -12.7705    | 6.032       | -12.9777    |
| 3     | $E_{CORR}^{\chi PM7}$     | 0.8164      | 0.0305          | 0.8373      | 0.0096            | 0.8468 | 0.18       | 0.2578      | 0.2823      | 88.465   | 0.9171     | 0.9006     | 0.1963     | 0.2157     | 3.2261     | 2.7891       | 84.7297     | 79.681      | 5.6125      | -13.4215    | 5.9665      | -12.6642    | 6.0053      | -12.975     |
| 4     | $E_{CORR}^{\omega HF}$    | 0.8149      | 0.0279          | 0.833       | 0.0098            | 0.8428 | 0.1861     | 0.2612      | 0.2834      | 85.7745  | 0.9147     | 0.8993     | 0.1948     | 0.2128     | 2.3876     | 2.8116       | 84.1642     | 79.0757     | 6.0155      | -12.8736    | 5.8637      | -12.8258    | 6.1713      | -12.7154    |
| 5     | $E_{CORR}^{\omega EPM7}$  | 0.814       | 0.0335          | 0.838       | 0.0095            | 0.8475 | 0.087      | 0.2572      | 0.2841      | 88.9369  | 0.9175     | 0.8999     | 0.1875     | 0.207      | 2.3156     | 2.8245       | 84.8945     | 79.8927     | 6.2103      | -12.5515    | 5.8932      | -12.713     | 5.957       | -12.8841    |
| 6     | $E_{CORR}^{\omega EPM7}$  | 0.8112      | 0.0462          | 0.8485      | 0.0089            | 0.8574 | 0.0707     | 0.2488      | 0.2863      | 96.1964  | 0.9232     | 0.8989     | 0.1846     | 0.2065     | 2.1658     | 2.8681       | 86.1778     | 79.7023     | 5.9639      | -12.8959    | 5.7564      | -12.906     | 5.6874      | -12.984     |
| 7     | $E_{CORR}^{\omega HF}$    | 0.8063      | 0.0412          | 0.8379      | 0.0095            | 0.8475 | -0.0449    | 0.2573      | 0.2899      | 88.8918  | 0.9174     | 0.8951     | 0.1961     | 0.2184     | 2.3166     | 2.9422       | 85.2673     | 79.4879     | 5.7321      | -13.3025    | 6.0085      | -12.7296    | 5.828       | -13.1233    |
| 8     | $E_{CORR}^{\omega HF}$    | 0.8006      | 0.0335          | 0.8238      | 0.0104            | 0.8341 | 0.1779     | 0.2683      | 0.2941      | 80.4652  | 0.9096     | 0.8914     | 0.1978     | 0.2174     | 2.519      | 3.028        | 83.6631     | 77.4428     | 5.846       | -12.7349    | 5.6552      | -13.1089    | 5.8157      | -13.0613    |
| 9     | $E_{CORR}^{\omega EPM7}$  | 0.7984      | 0.0326          | 0.8204      | 0.0106            | 0.831  | 0.3301     | 0.2708      | 0.2958      | 78.6728  | 0.9077     | 0.8897     | 0.2125     | 0.2331     | 2.5667     | 3.0625       | 83.3655     | 77.1697     | 5.8143      | -13.0602    | 5.6514      | -13.1327    | 5.682       | -13.1559    |
| 10    | $E_{CORR}^{\omega HF}$    | 0.7966      | 0.0351          | 0.8212      | 0.0105            | 0.8318 | 0.1782     | 0.2702      | 0.2971      | 79.1007  | 0.9082     | 0.8889     | 0.2116     | 0.2333     | 2.5551     | 3.0887       | 83.085      | 77.1534     | 5.9825      | -12.6376    | 6.4488      | -12.123     | 5.7446      | -13.0577    |
| 11    | $E_{CORR}^{\omega EPM7}$  | 0.7922      | 0.0324          | 0.8136      | 0.011             | 0.8246 | 0.188      | 0.2759      | 0.3003      | 75.2105  | 0.9039     | 0.8861     | 0.2046     | 0.224      | 2.6641     | 3.1559       | 82.4311     | 75.9355     | 5.7855      | -13.1565    | 5.8769      | -12.7784    | 5.9325      | -12.9026    |
| 12    | $E_{CORR}^{\omega XCORR}$ | 0.7739      | 0.0371          | 0.7991      | 0.0118            | 0.8109 | 0.1032     | 0.2864      | 0.3132      | 68.6208  | 0.8956     | 0.8749     | 0.2142     | 0.2357     | 2.8716     | 3.4343       | 81.8425     | 72.2085     | 5.8767      | -13.0991    | 6.126       | -12.4714    | 5.7948      | -13.053     |
| 13    | $E_{CORR}^{\omega XCORR}$ | 0.7693      | 0.0384          | 0.7958      | 0.012             | 0.8078 | 0.1149     | 0.2888      | 0.3164      | 67.235   | 0.8937     | 0.8725     | 0.2126     | 0.2343     | 2.9194     | 3.5029       | 81.1197     | 72.9717     | 5.6912      | -13.224     | 5.6789      | -13.0259    | 5.968       | -12.797     |
| 14    | $E_{CORR}^{\omega XCORR}$ | 0.7541      | 0.0403          | 0.7816      | 0.0128            | 0.7944 | 0.0339     | 0.2987      | 0.3267      | 61.8277  | 0.8854     | 0.862      | 0.2261     | 0.2495     | 3.1222     | 3.7345       | 79.3658     | 72.6104     | 5.8074      | -12.9943    | 5.8126      | -13.0104    | 5.7312      | -13.1559    |
| 15    | $E_{PM7}^{\omega EPM7}$   | 0.7497      | 0.0657          | 0.8038      | 0.0115            | 0.8153 | 0.045      | 0.2831      | 0.3296      | 70.648   | 0.8983     | 0.8648     | 0.2153     | 0.2427     | 2.8044     | 3.8017       | 82.1065     | 73.5693     | 6.0146      | -12.8827    | 5.8443      | -12.8509    | 5.7286      | -13.3305    |
| 16    | $E_{CORR}^{\omega EPM7}$  | 0.7472      | 0.0375          | 0.7713      | 0.0135            | 0.7848 | 0.2572     | 0.3056      | 0.3312      | 58.3438  | 0.8984     | 0.8586     | 0.2249     | 0.2461     | 3.2685     | 3.8388       | 78.2467     | 72.6914     | 6.146       | -12.6077    | 6.1127      | -13.0188    | 5.832       | -12.689     |
| 17    | $E_{CORR}^{\omega HF}$    | 0.7344      | 0.0253          | 0.7524      | 0.0073            | 0.7597 | 0.8716     | 0.3229      | 0.3395      | 104.3214 | 0.8634     | 0.8484     | 0.2431     | 0.2576     | 3.6497     | 4.0338       | 75.7004     | 70.0061     | 2.8053      | -9.4043     | 2.9703      | -9.1854     | 2.9102      | -9.3592     |
| 18    | $E_{CORR}^{\omega HF}$    | 0.7298      | 0.0314          | 0.7463      | 0.0149            | 0.7612 | -0.0004    | 0.3219      | 0.3424      | 51.0096  | 0.8644     | 0.8462     | 0.2452     | 0.2638     | 3.6263     | 4.1031       | 76.0638     | 68.6495     | 5.8314      | -13.6427    | 6.1157      | -12.4674    | 5.6143      | -13.604     |
| 19    | $E_{PM7}^{\omega PM7}$    | 0.7293      | 0.0171          | 0.7879      | 0.0125            | 0.8004 | 0.0306     | 0.2943      | 0.3427      | 64.149   | 0.8827     | 0.862      | 0.2236     | 0.252      | 3.0318     | 4.1106       | 80.666      | 71.5625     | 6.0053      | -12.8952    | 5.7814      | -12.9847    | 5.967       | -13.023     |
| 20    | $E_{CORR}^{\omega HF}$    | 0.7274      | 0.0341          | 0.7465      | 0.0149            | 0.7614 | 0.3761     | 0.3217      | 0.3439      | 51.0646  | 0.8646     | 0.8453     | 0.237      | 0.2568     | 3.6233     | 4.1405       | 76.1567     | 69.7071     | 5.796       | -13.528     | 5.8388      | -12.7554    | 5.7923      | -13.3137    |
| 21    | $E_{CORR}^{\omega XCORR}$ | 0.7207      | 0.0405          | 0.7462      | 0.0149            | 0.7612 | 0.1494     | 0.3219      | 0.3481      | 50.995   | 0.8644     | 0.8414     | 0.239      | 0.2615     | 3.6271     | 4.2418       | 76.203      | 69.8057     | 5.9029      | -12.9582    | 5.7175      | -12.9642    | 6.0137      | -12.7241    |
| 22    | $E_{PM7}^{\omega dPM7}$   | 0.7188      | 0.0874          | 0.794       | 0.0121            | 0.8061 | 0.3975     | 0.29        | 0.3493      | 66.526   | 0.8727     | 0.8488     | 0.2203     | 0.2525     | 2.9445     | 4.2712       | 81.1769     | 72.3726     | 5.9771      | -13.3559    | 5.8404      | -12.6638    | 6.0096      | -13.1278    |
| 23    | $E_{CORR}^{\omega dCORR}$ | 0.7129      | 0.0583          | 0.7569      | 0.0143            | 0.7712 | 0.3266     | 0.3151      | 0.3529      | 53.9374  | 0.8708     | 0.8383     | 0.2379     | 0.2652     | 3.4745     | 4.3597       | 77.8886     | 67.5906     | 5.9435      | -12.9789    | 6.2722      | -12.2768    | 5.7986      | -12.9654    |
| 24    | $E_{PM7}^{\omega PM7}$    | 0.7058      | 0.0471          | 0.7454      | 0.0075            | 0.7529 | 0.8677     | 0.3274      | 0.3573      | 100.5679 | 0.8591     | 0.8329     | 0.2348     | 0.252      | 3.7522     | 4.4675       | 75.537      | 65.5995     | 5.0697      | -9.1406     | 2.7987      | -9.306      | 3.1177      | -9.2348     |
| 25    | $E_{PM7}^{\omega EPM7}$   | 0.7051      | 0.058           | 0.7483      | 0.0148            | 0.7631 | 0.045      | 0.3206      | 0.3577      | 51.5381  | 0.8656     | 0.834      | 0.2292     | 0.2523     | 3.5979     | 4.4792       | 76.8309     | 68.2883     | 5.6326      | -13.3518    | 5.8029      | -12.8508    | 5.911       | -13.0139    |
| 26    | $E_{CORR}^{\omega dPM7}$  | 0.6981      | 0.0619          | 0.745       | 0.015             | 0.76   | 0.2803     | 0.3227      | 0.3619      | 50.6597  | 0.8636     | 0.8298     | 0.2428     | 0.2724     | 3.6453     | 4.5847       | 76.5783     | 68.2601     | 5.9504      | -13.3794    | 5.7384      | -12.9014    | 5.637       | -13.8345    |
| 27    | $E_{CORR}^{\omega dPM7}$  | 0.694       | 0.0656          | 0.7447      | 0.015             | 0.7597 | 0.32       | 0.3229      | 0.3644      | 50.5811  | 0.8634     | 0.8277     | 0.2431     | 0.2735     | 3.6496     | 4.6466       | 76.6897     | 66.9832     | 5.6811      | -13.449     | 5.9201      | -12.8173    | 6.1242      | -13.0373    |
| 28    | $E_{PM7}^{\omega XPM7}$   | 0.6917      | 0.0676          | 0.7443      | 0.015             | 0.7593 | 0.2027     | 0.3232      | 0.3658      | 50.7434  | 0.8632     | 0.8268     | 0.2394     | 0.2655     | 3.6555     | 4.6824       | 76.6057     | 64.7418     | 5.9102      | -13.0641    | 6.0544      | -12.6925    | 5.9497      | -12.5278    |
| 29    | $E_{PM7}^{\omega PM7}$    | 0.6433      | 0.0551          | 0.6893      | 0.0091            | 0.6984 | 0.8357     | 0.3618      | 0.3934      | 76.4158  | 0.8227     | 0.7926     | 0.2308     | 0.252      | 3.9045     | 5.417        | 70.1242     | 59.8426     | 2.8587      | -9.54       | 2.9005      | -9.2408     | 2.8034      | -9.2864     |
| 30    | $\omega PM7$              | 0.6259      | 0.0553          | 0.6716      | 0.0097            | 0.6812 | 0.8254     | 0.3719      | 0.4029      | 70.5284  | 0.8104     | 0.7796     | 0.3022     | 0.3238     | 4.841      | 5.6814       | 68.0731     | 59.2526     | 2.9654      | -9.3368     | 2.972       | -9.2781     | 3.0632      | -9.1607     |
| 31    | $E_{CORR}^{\omega EPM7}$  | 0.5923      | 0.0475          | 0.629       | 0.0109            | 0.6399 | 0.7999     | 0.3953      | 0.4206      | 58.6377  | 0.7804     | 0.7521     | 0.3084     | 0.3277     | 5.4691     | 6.1911       | 63.9071     | 53.848      | 3.0813      | -9.3218     | 2.9053      | -9.3096     | 2.7713      | -9.6362     |
| 32    | $E_{DFT}^{\omega DFT}$    | 0.5286      | 0.1017          | 0.6072      | 0.0231            | 0.6303 | 0.2744     | 0.4005      | 0.4523      | 27.2759  | 0.7312     | 0.7148     | 0.323      | 0.3606     | 5.615      | 7.1588       | 64.0416     | 49.7898     | 5.4709      | -13.4922    | 6.0789      | -12.5493    | 5.8191      | -13.0172    |
| 33    | $E_{DFT}^{\omega EPM7}$   | 0.5054      | 0.1078          | 0.589       | 0.0242            | 0.6132 | 0.2725     | 0.4097      | 0.4633      | 25.3644  | 0.7602     | 0.6985     | 0.331      | 0.3699     | 5.8745     | 7.5116       | 62.514      | 47.3856     | 5.9302      | -12.9781    | 6.078       | -12.6002    | 5.807       | -13.0341    |
| 34    | $E_{HF}^{\omega HF}$      | 0.4953      | 0.1099          | 0.5806      | 0.0247            | 0.6053 | 0.336      | 0.4139      | 0.468       | 24.5324  | 0.7541     | 0.6914     | 0.331      | 0.3695     | 5.9951     | 7.6644       | 61.706      | 45.9385     | 5.6268      | -13.2035    | 5.8616      | -12.7719    | 5.8741      | -12.8461    |
| 35    | $\chi CORR$               | 0.4846      | 0.0653          | 0.5363      | 0.0136            | 0.5499 | 0.7416     | 0.4419      | 0.4729      | 40.3196  | 0.7096     | 0.6694     | 0.3505     | 0.3742     | 6.8355     | 7.8267       | 54.6536     | 44.3245     | 0.136       | -9.2408     | 3.0337      | -9.2223     | 2.9999      | -9.4002     |
| 36    | $E_{HF}^{\omega HF}$      | 0.4818      | 0.1085          | 0.5647      | 0.0256            | 0.5903 | 0.2892     | 0.4216      | 0.4742      | 23.057   | 0.7424     | 0.6791     | 0.3499     | 0.3894     | 6.2215     | 7.8699       | 59.9205     | 43.619      | 5.5996      | -13.2817    | 6.26        | -12.29      | 6.148       | -12.6139    |
| 37    | $\omega DFT$              | 0.4696      | 0.0743          | 0.5301      | 0.0138            | 0.5349 | 0.7375     | 0.4449      | 0.4797      | 39.3556  | 0.7046     | 0.6596     | 0.3628     | 0.3889     | 6.9266     | 8.0553       | 54.4727     | 41.5116     | 2.9931      | -9.2423     | 2.8013      | -9.418      | 2.8687      | -9.3251     |
| 38    | $E_{HF}^{\omega HF}$      | 0.4671      | 0.1169          | 0.558       | 0.026             | 0.584  | 0.2915     | 0.4248      | 0.4809      | 22.4648  | 0.7374     | 0.6707     | 0.3502     | 0.3908     | 6.3173     | 8.093        | 59.4013     | 44.9001     | 6.1386      | -12.6232    | 5.8652      | -12.7542    | 6.2381      | -12.        |

# Supporting Information Figures S1 and S2

Evaluating the role of electron-correlation in the external prediction of the toxicity of Nitrobenzenes towards *Tetrahymena pyriformis*

Reenu and Vikas\*

*Quantum Chemistry Group, Department of Chemistry & Centre of Advanced Studies in Chemistry, Panjab University, Chandigarh-160014, India*

## List of Figures

**Figure S1.** Williams plots of the Standardized residuals vs Leverage ( $h$ ) for inhibitory growth concentration ( $\text{Log } IGC_{50}^{-1}$ ) of alkyl- and halogen-substituted nitrobenzenes for best models obtained with the electron-correlation contribution (CORR) of the energies based descriptors with 30% ordered response splitting. Training and prediction set chemicals are represented with open (yellow) and filled (blue) circles, respectively. The encircled values represent ID number of the compounds (refer to Supporting Information Table S1). The vertical (solid) line indicates warning leverage  $h^*$ , whereas the horizontal (dashed) line specifies standardized residual value of 3.0.

**Figure S2.** Scatter plots of the Experimental vs Predicted inhibitory growth concentration ( $\text{Log } IGC_{50}^{-1}$ ) of alkyl- and halogen-substituted nitrobenzenes for best models developed with the electron-correlation contribution (CORR) of the energies based descriptors with 30% ordered response splitting. Training and prediction set chemicals are represented with open (yellow) and filled (blue) circles, respectively.

Figure S1

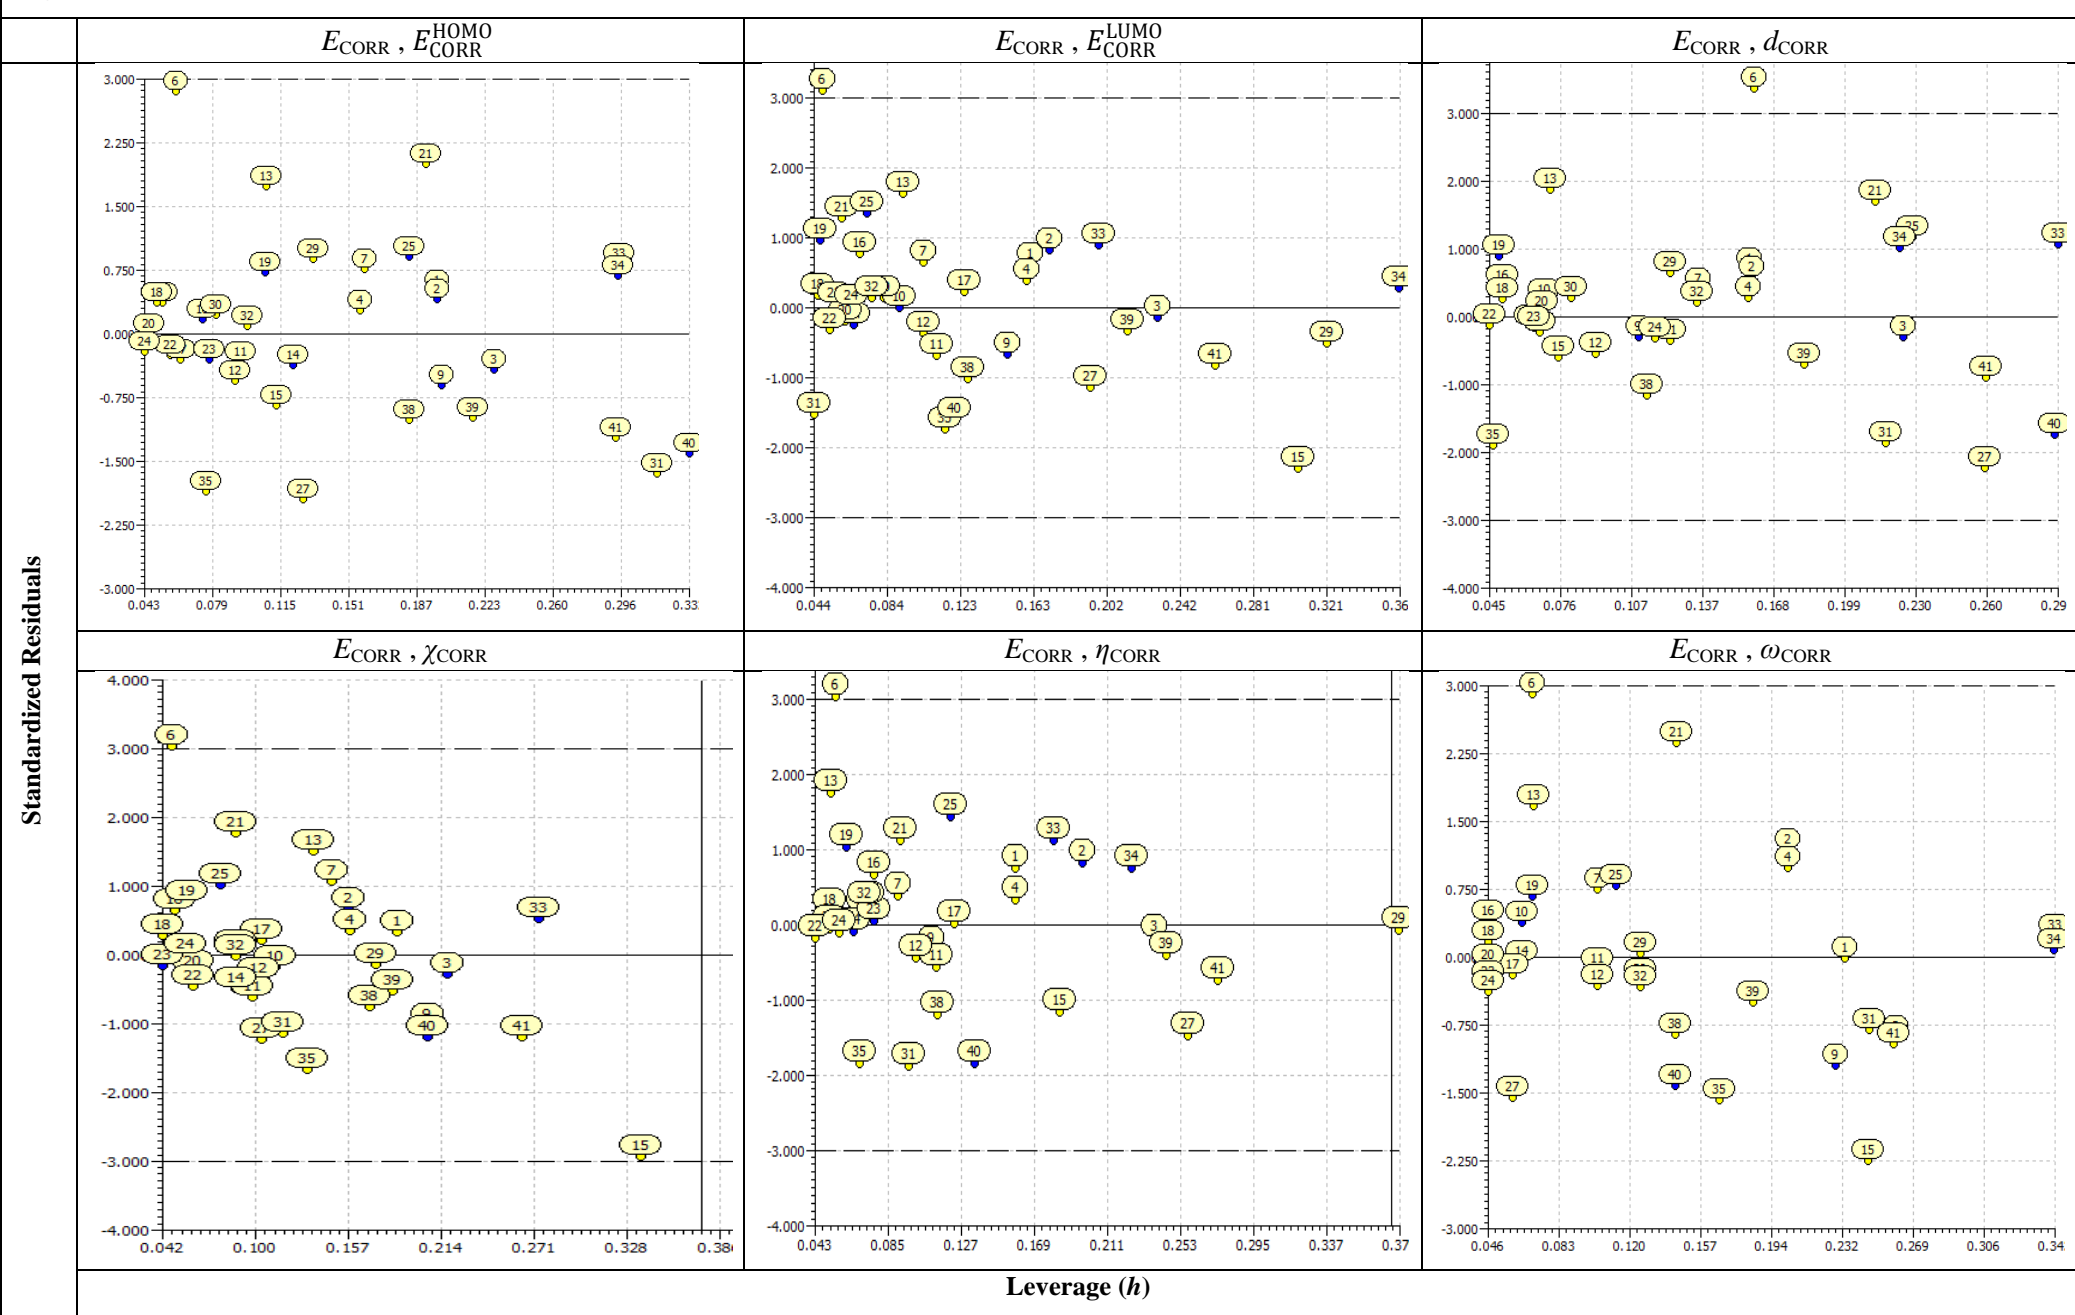

Figure S1 continued...

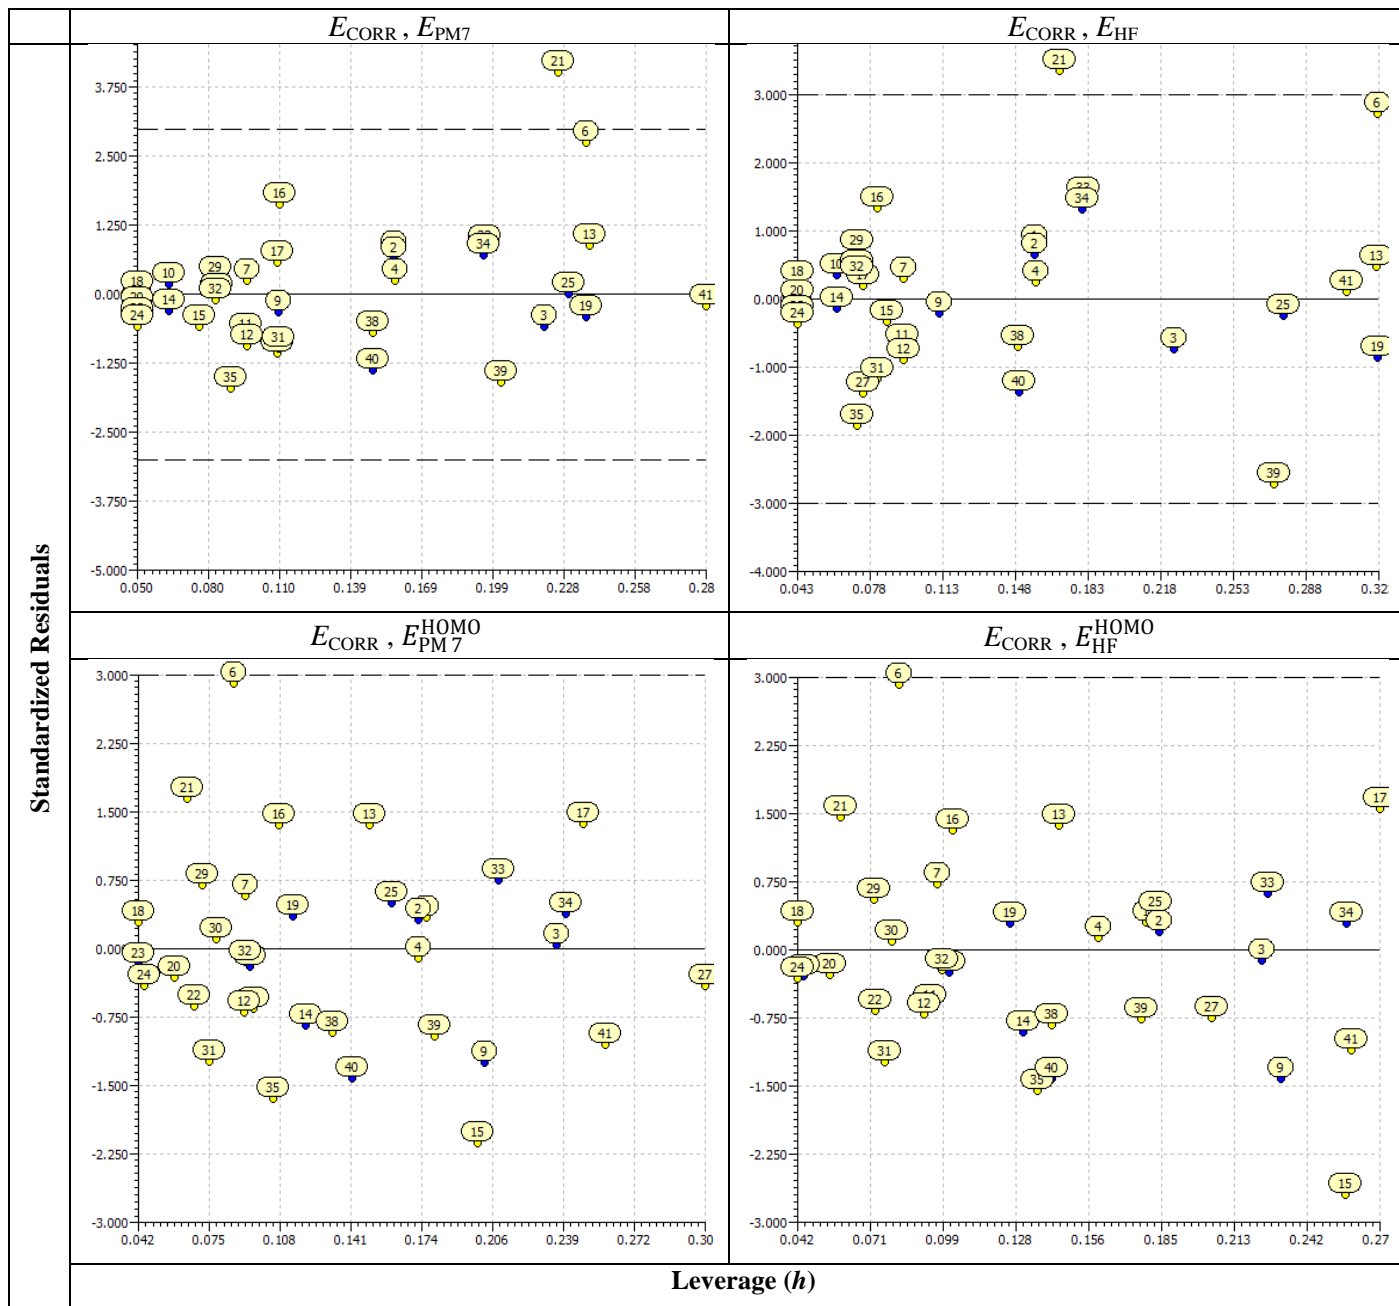

Figure S1 continued...

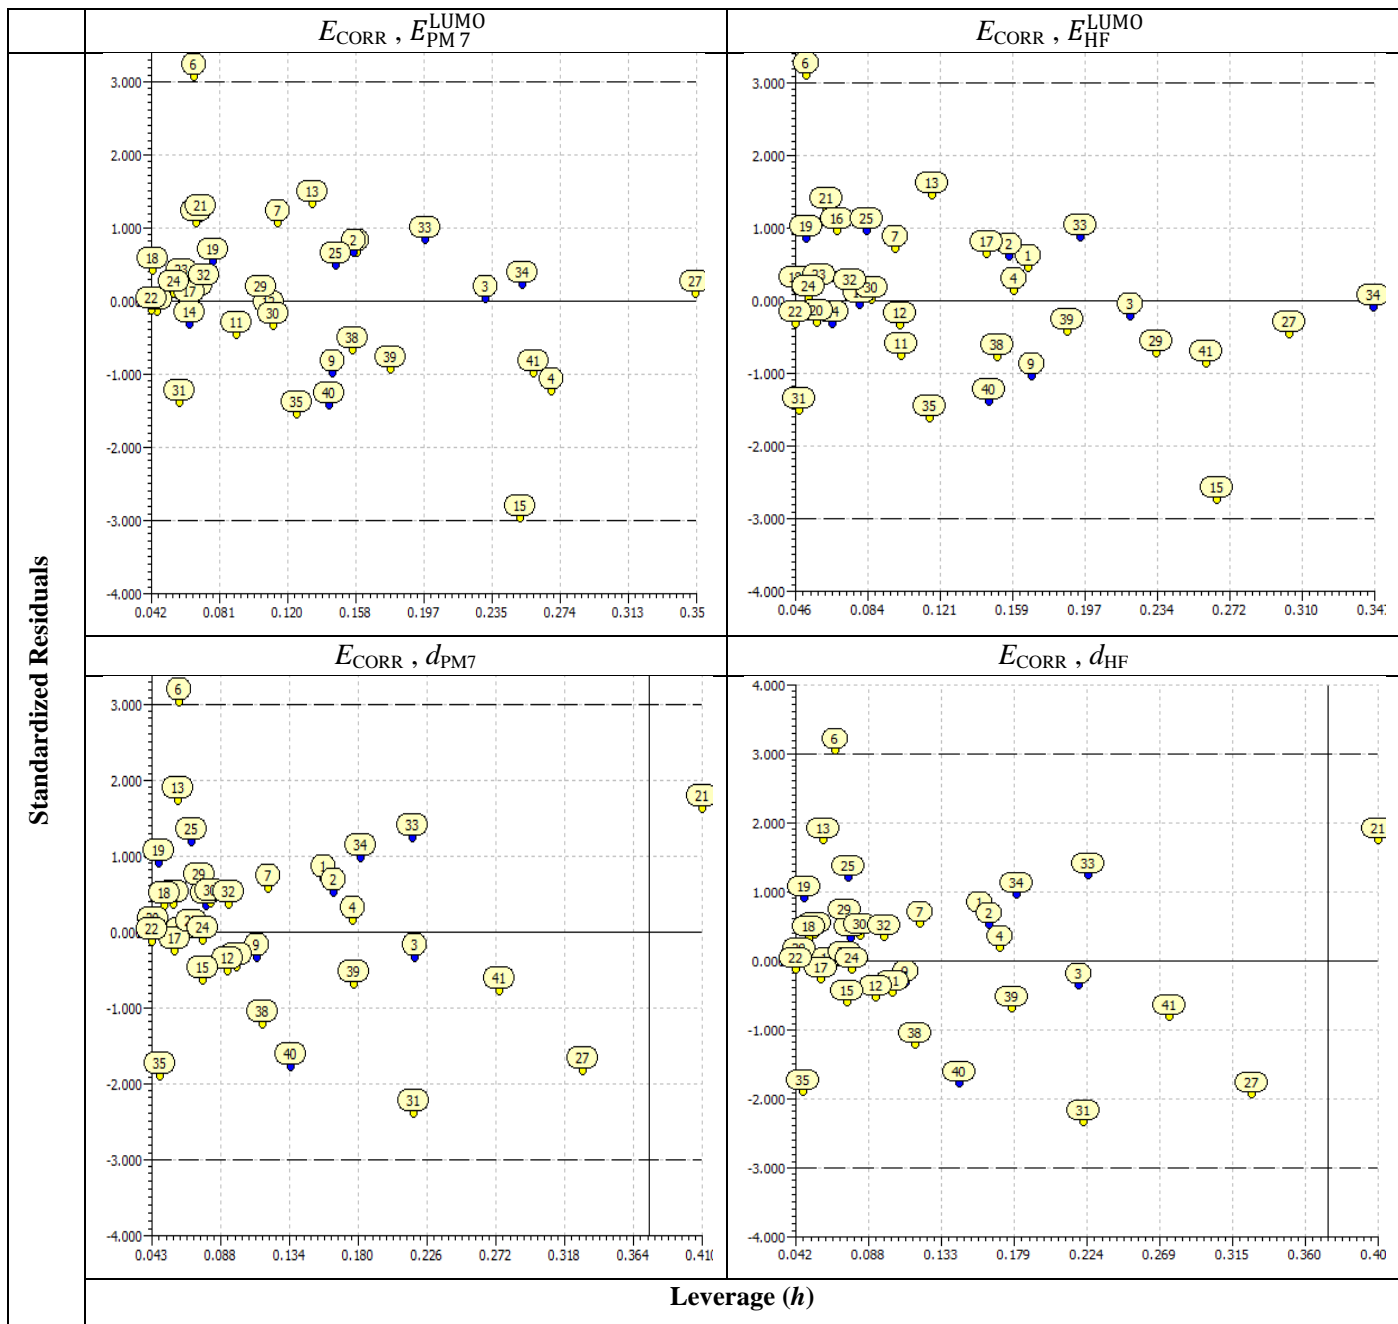

Figure S1 continued...

Figure S1

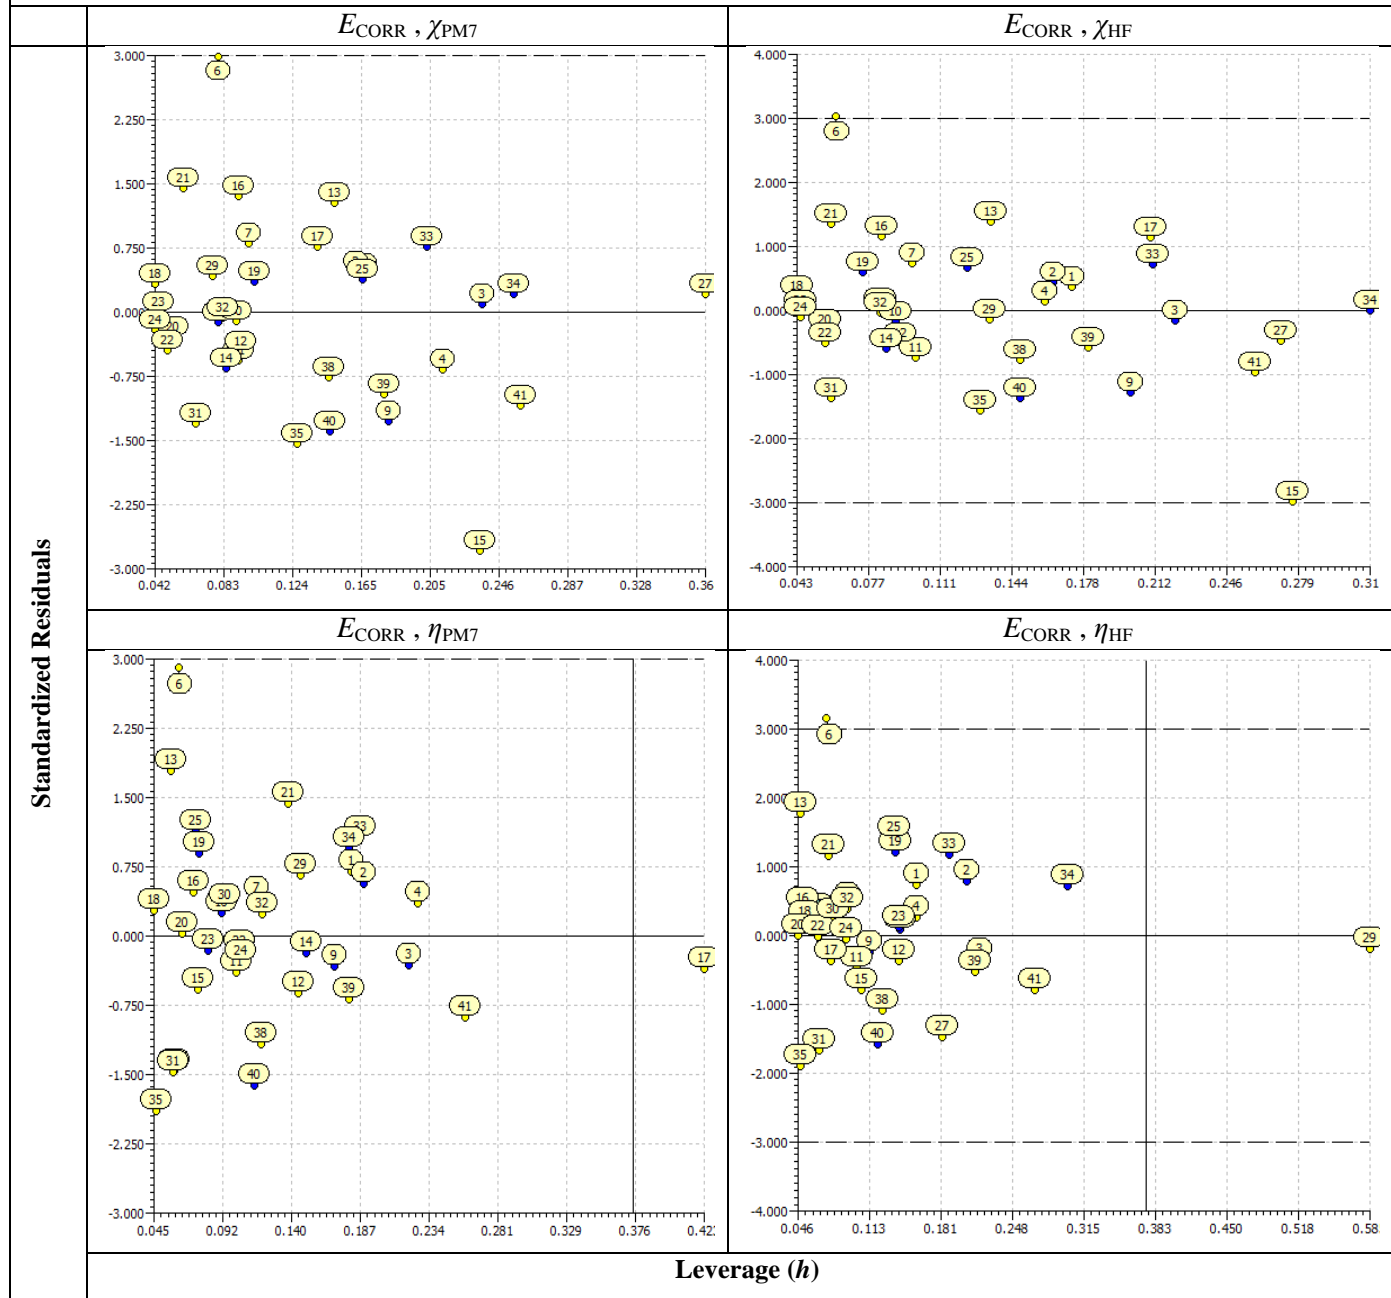

Figure S1 continued...

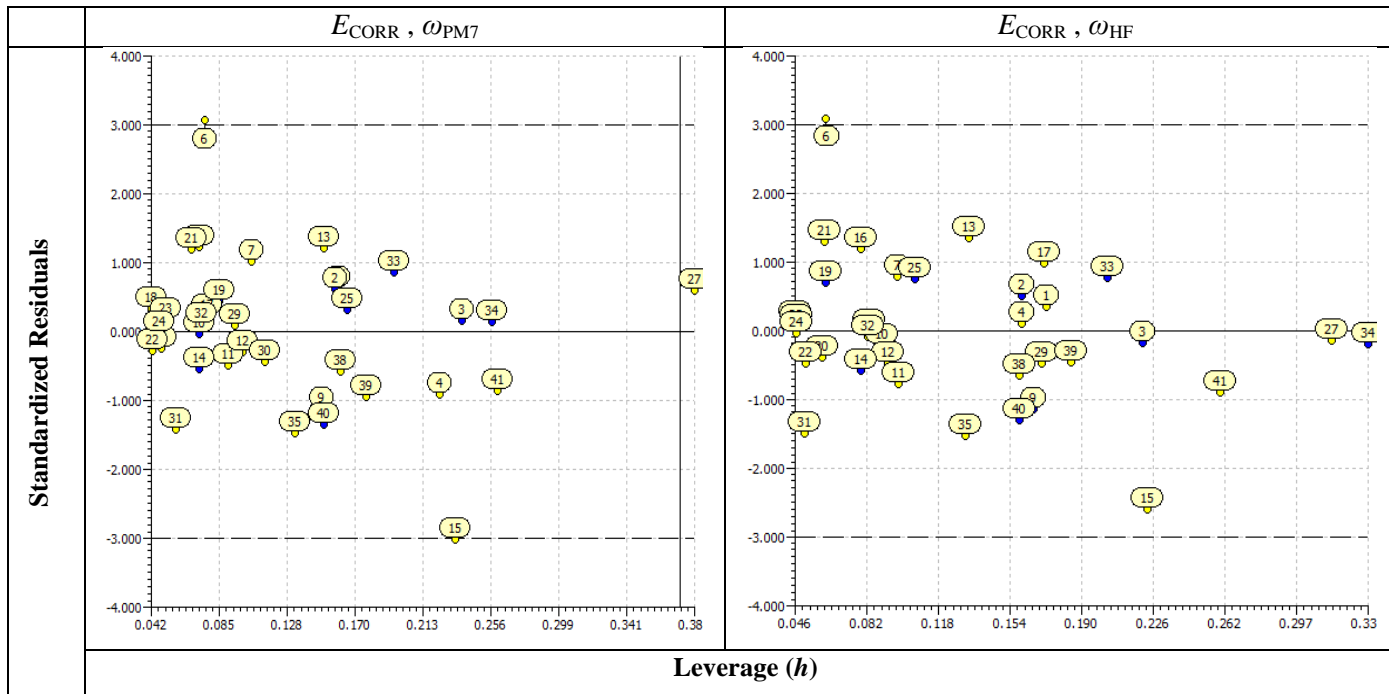

Figure S2

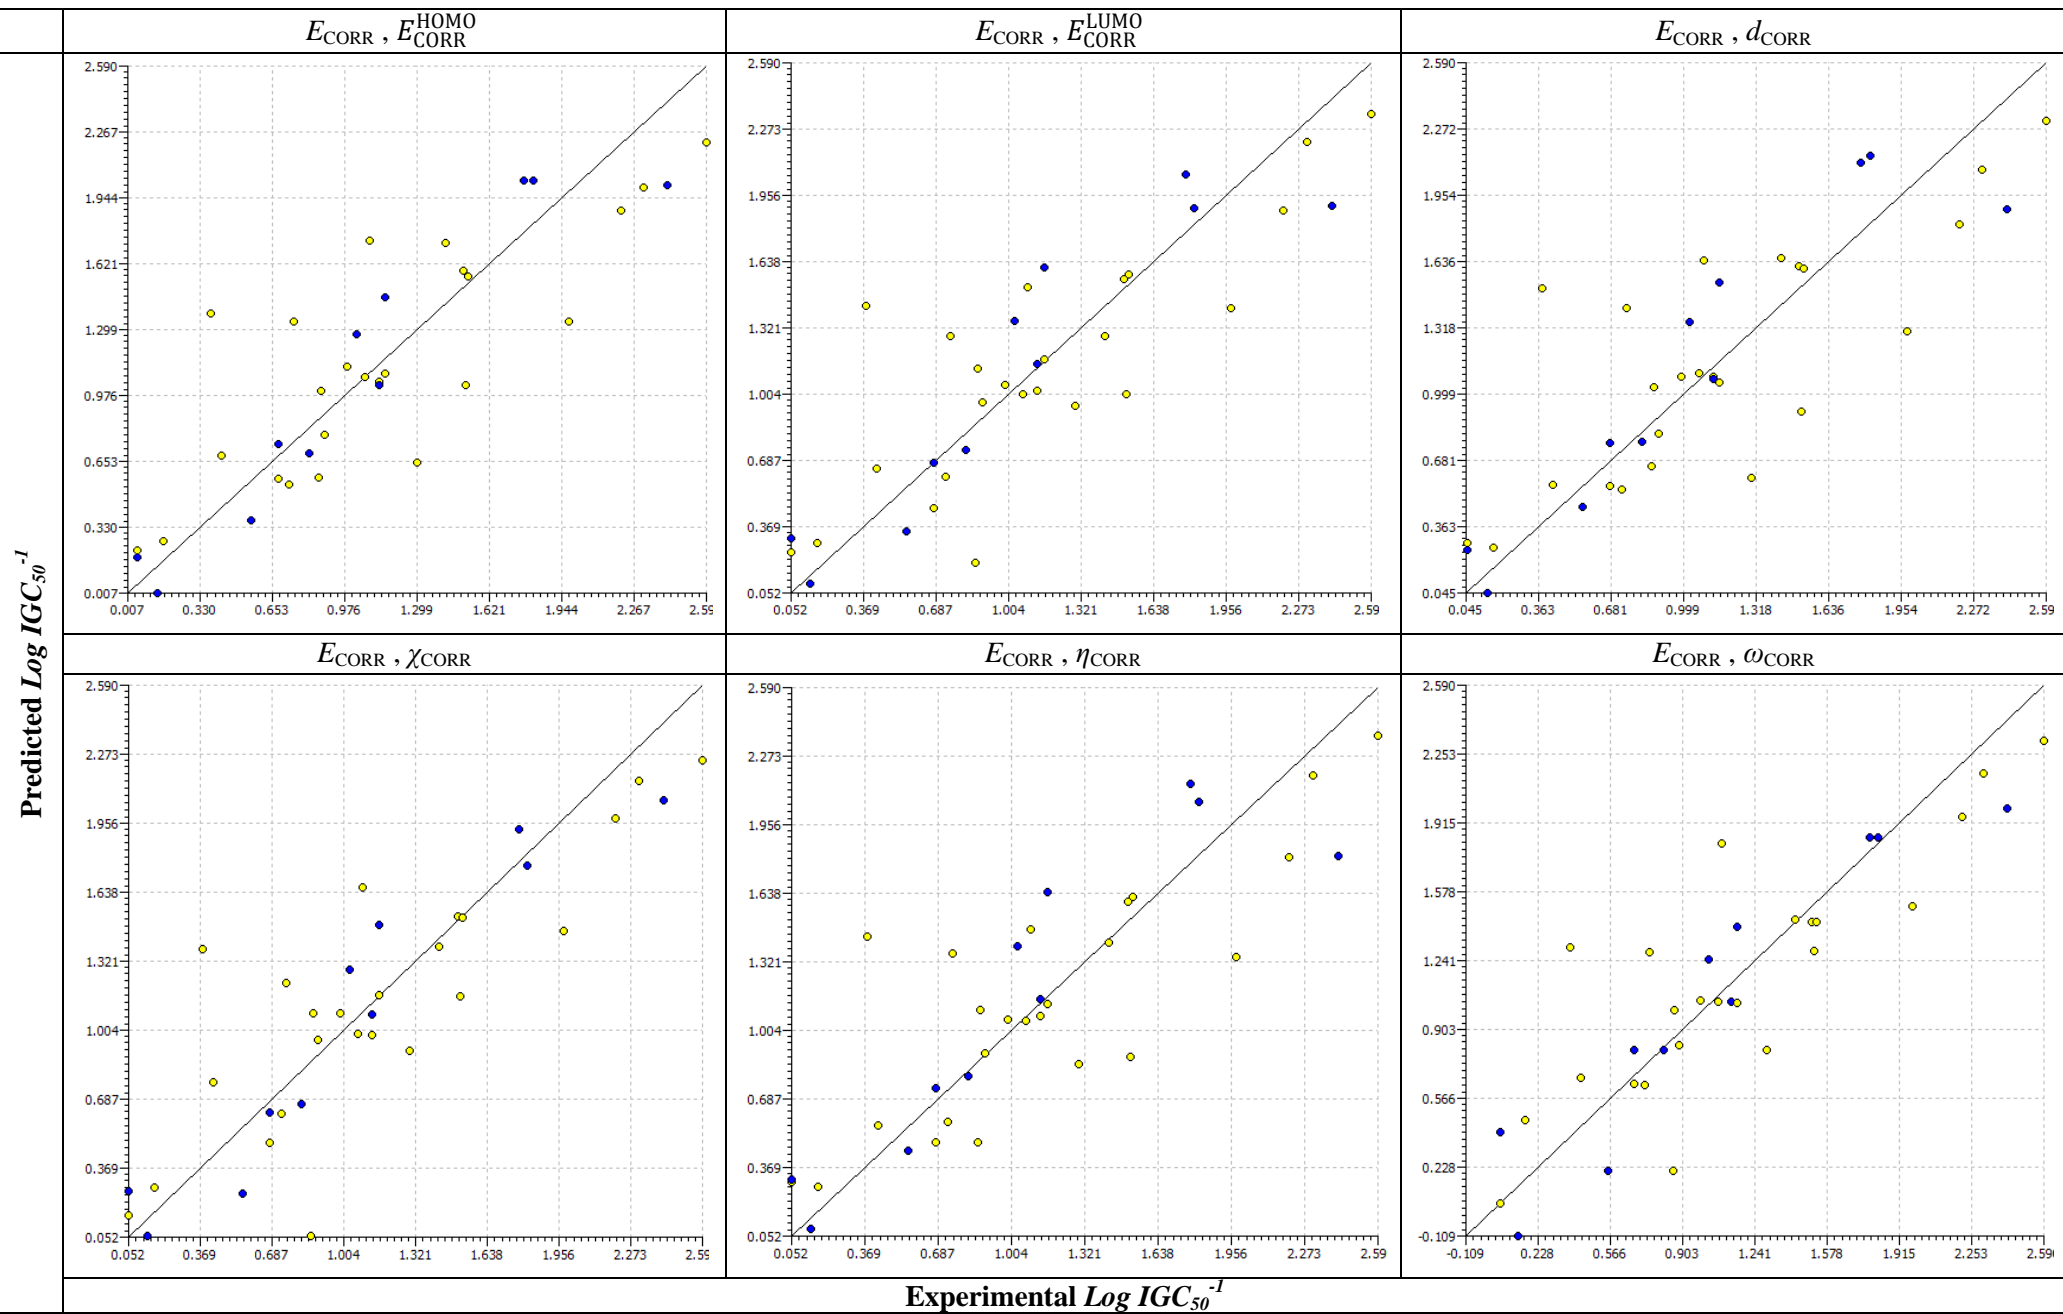

Figure S2 continued...



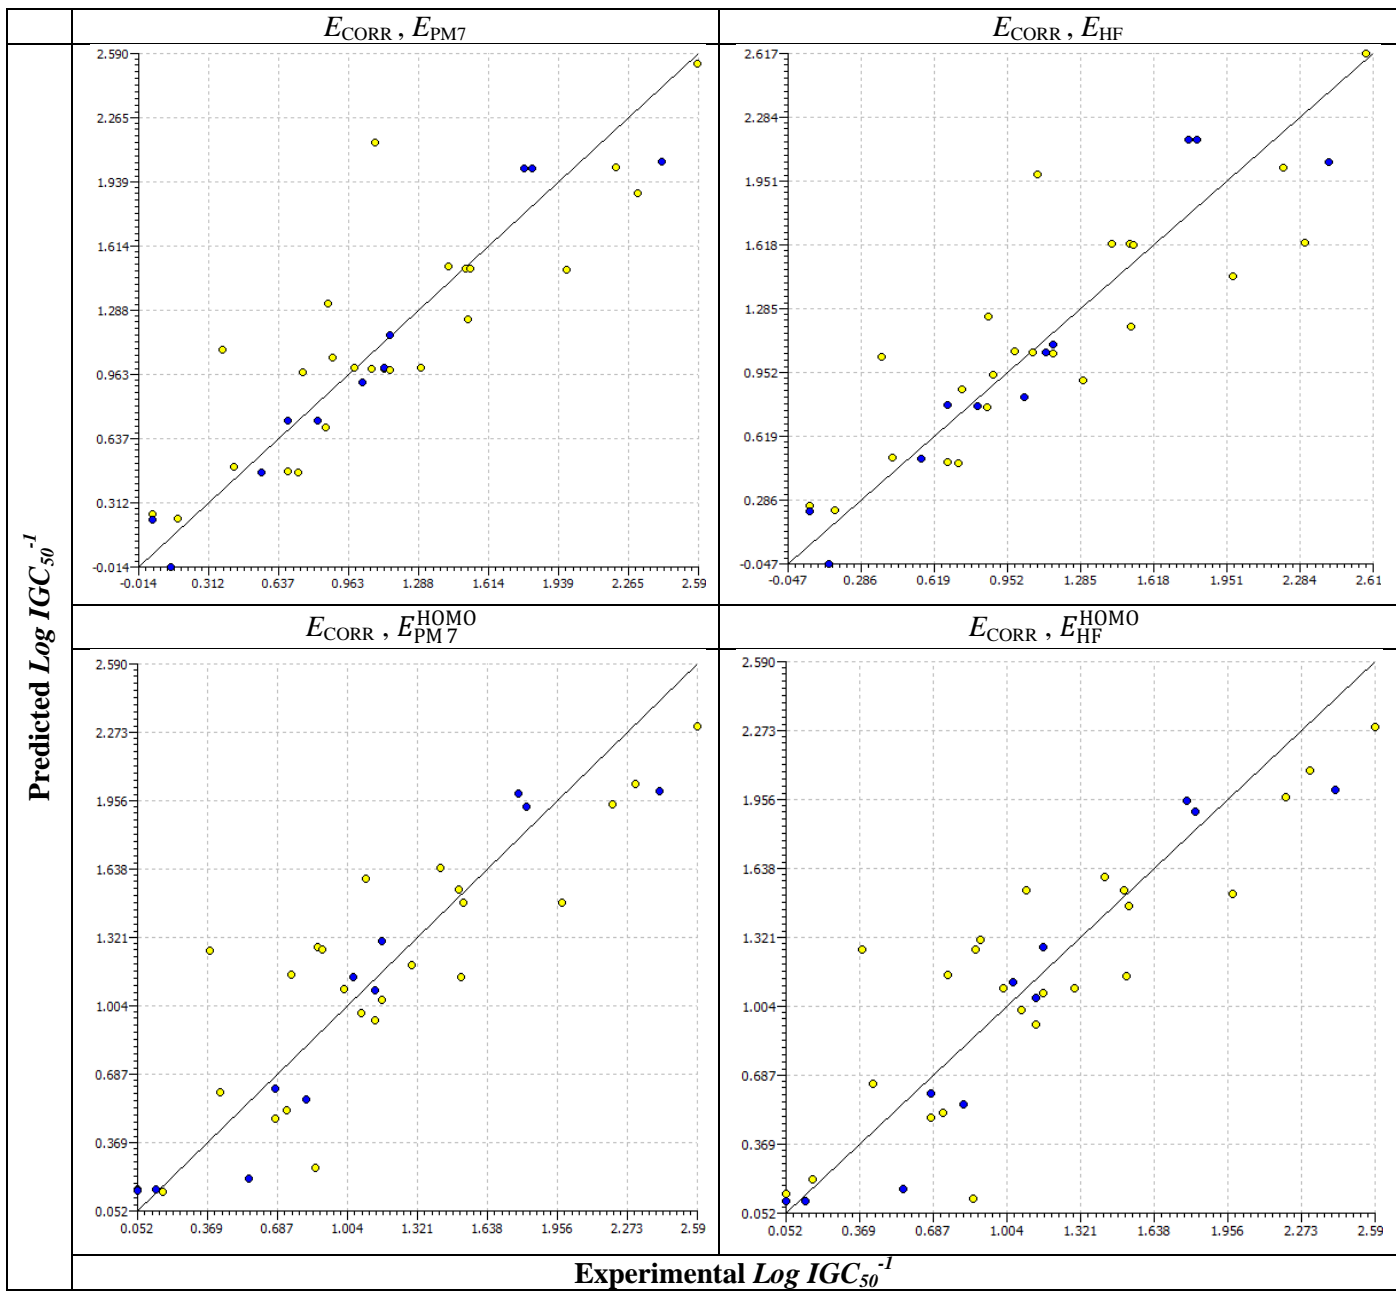

Figure S1 continued...

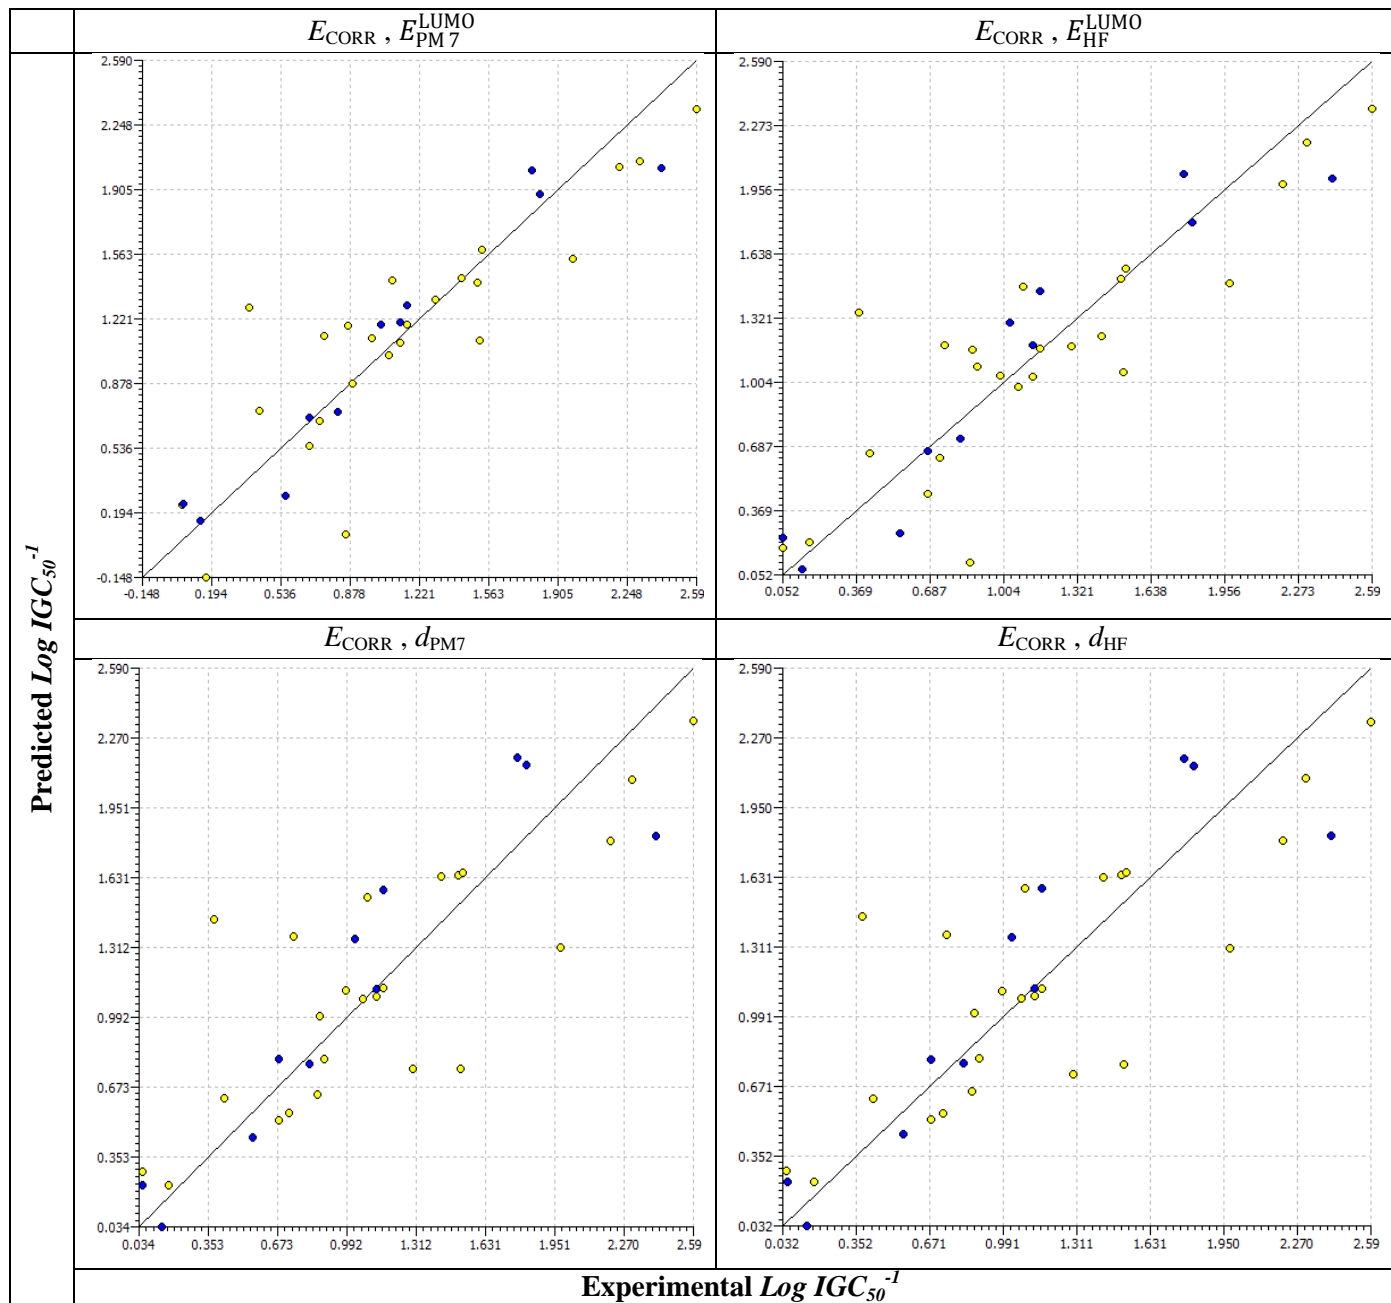

Figure S2 continued...

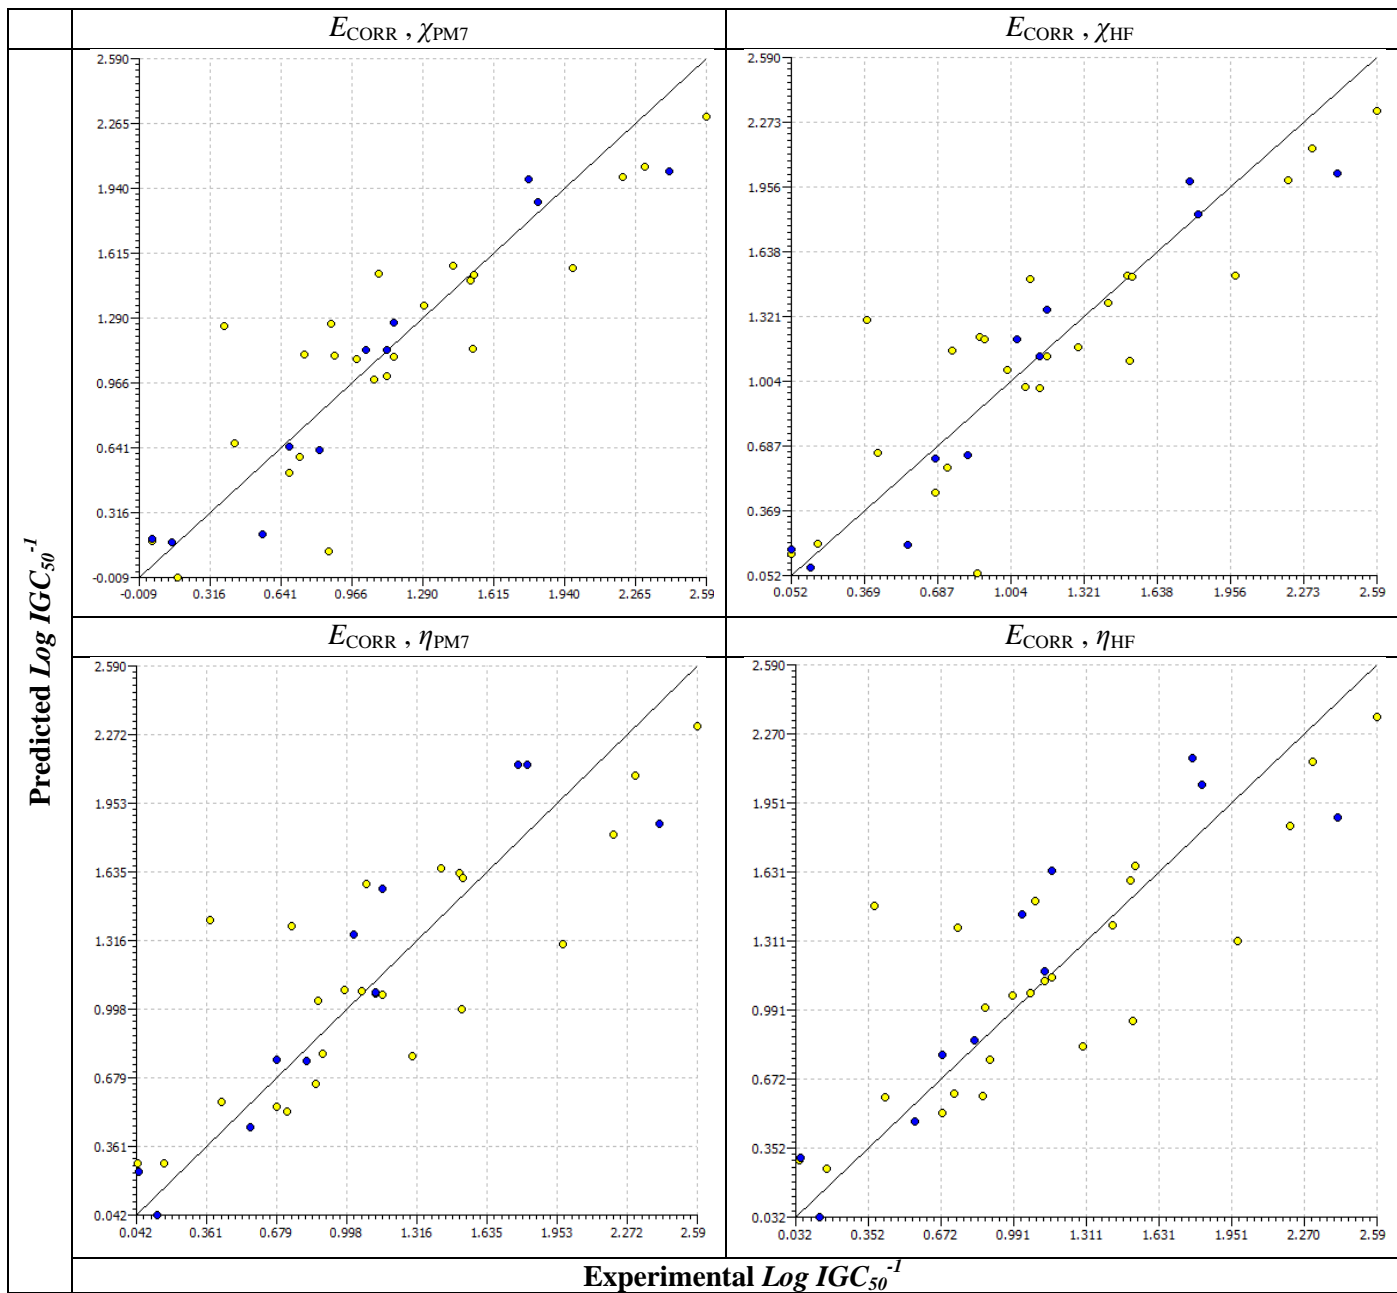

Figure S2 continued...

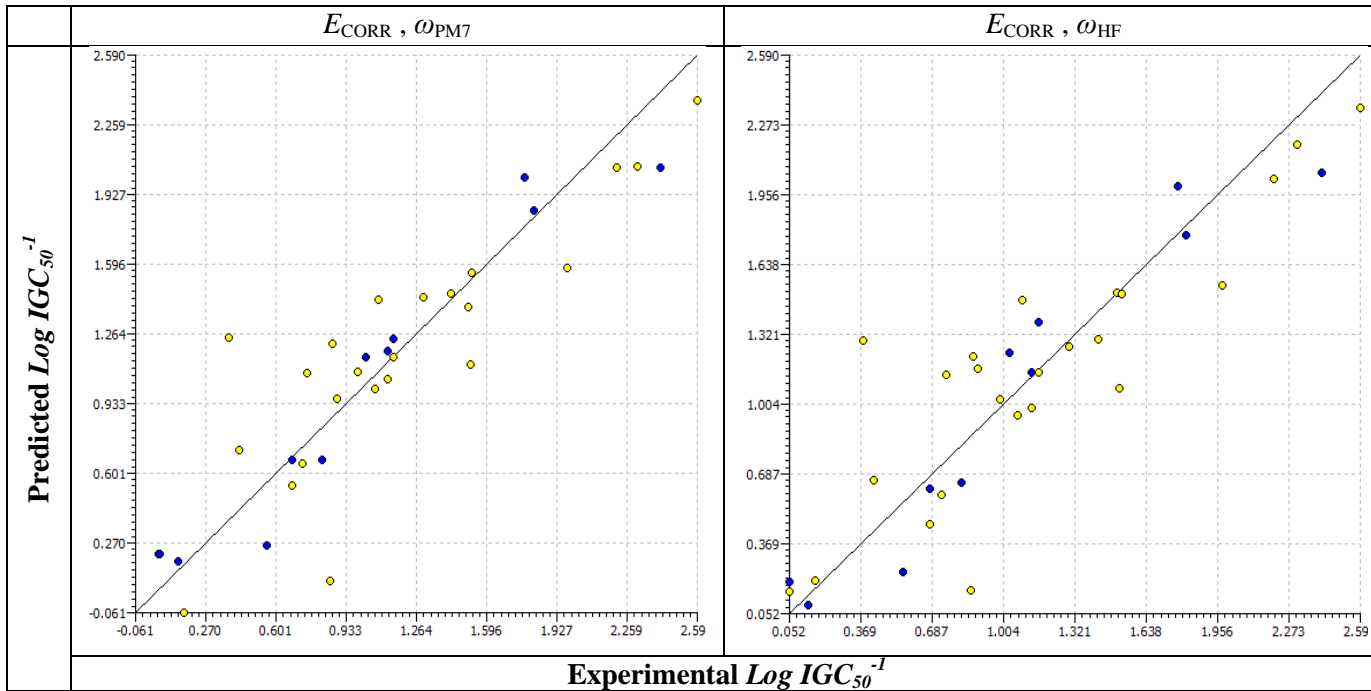

Supplement: c5nj02552d1.pdf [file c5nj02552d1.pdf]
